# Supplementary material for: Safety and efficacy of dual versus triple antithrombotic therapy (DAT vs TAT) in patients with atrial fibrillation following a PCI: a systematic review and network meta-analysis
Source: PubMed Central journal article supplement — BMJ Open. 2020 Sep 29;10(9):e036138. doi: 10.1136/bmjopen-2019-036138 (PMC7526290; doi:10.1136/bmjopen-2019-036138), 2020-09-29
Supplement: bmjopen-2019-036138.draft_revisions.pdf [file bmjopen-2019-036138.draft_revisions.pdf]

# BMJ Open

BMJ Open is committed to open peer review. As part of this commitment we make the peer review history of every article we publish publicly available.

When an article is published we post the peer reviewers' comments and the authors' responses online. We also post the versions of the paper that were used during peer review. These are the versions that the peer review comments apply to.

The versions of the paper that follow are the versions that were submitted during the peer review process. They are not the versions of record or the final published versions. They should not be cited or distributed as the published version of this manuscript.

BMJ Open is an open access journal and the full, final, typeset and author-corrected version of record of the manuscript is available on our site with no access controls, subscription charges or pay-per-view fees (<http://bmjopen.bmj.com>).

If you have any questions on BMJ Open's open peer review process please email [info.bmjopen@bmj.com](mailto:info.bmjopen@bmj.com)

# BMJ Open

## Safety and efficacy of dual vs. triple antithrombotic therapy (DAT vs. TAT) in patients with atrial fibrillation following a PCI: a systematic review and network meta-analysis

|                               |                                                                                                                                                                                                                                                                                                                                                                                                                                                                                                                                                                                                                                                                                                                                                                                                                                                                                                                                                                                                                                                                                                                                          |
|-------------------------------|------------------------------------------------------------------------------------------------------------------------------------------------------------------------------------------------------------------------------------------------------------------------------------------------------------------------------------------------------------------------------------------------------------------------------------------------------------------------------------------------------------------------------------------------------------------------------------------------------------------------------------------------------------------------------------------------------------------------------------------------------------------------------------------------------------------------------------------------------------------------------------------------------------------------------------------------------------------------------------------------------------------------------------------------------------------------------------------------------------------------------------------|
| Journal:                      | <i>BMJ Open</i>                                                                                                                                                                                                                                                                                                                                                                                                                                                                                                                                                                                                                                                                                                                                                                                                                                                                                                                                                                                                                                                                                                                          |
| Manuscript ID                 | bmjopen-2019-036138                                                                                                                                                                                                                                                                                                                                                                                                                                                                                                                                                                                                                                                                                                                                                                                                                                                                                                                                                                                                                                                                                                                      |
| Article Type:                 | Original research                                                                                                                                                                                                                                                                                                                                                                                                                                                                                                                                                                                                                                                                                                                                                                                                                                                                                                                                                                                                                                                                                                                        |
| Date Submitted by the Author: | 02-Dec-2019                                                                                                                                                                                                                                                                                                                                                                                                                                                                                                                                                                                                                                                                                                                                                                                                                                                                                                                                                                                                                                                                                                                              |
| Complete List of Authors:     | <p>Altoukhi, Renad; King Saud bin Abdulaziz University for Health Sciences, College of Pharmacy</p> <p>Alshouimi, Reema; King Saud bin Abdulaziz University for Health Sciences, College of Pharmacy</p> <p>Al Rammah, Shahad ; King Saud bin Abdulaziz University for Health Sciences, College of Pharmacy</p> <p>Alzahrani, Mohammed; King Saud bin Abdulaziz University for Health Sciences, College of Pharmacy - Department of Pharmacy Practice</p> <p>Almutairi, Abdulaali ; University of Arizona, College of Pharmacy; King Saud bin Abdulaziz University for Health Sciences, College of Pharmacy - Department of Pharmacy Practice</p> <p>Alshehri, Abdulmajeed; King Saud bin Abdulaziz University for Health Sciences, College of Pharmacy - Department of Pharmacy Practice</p> <p>Alfayez, Osamah; Qassim University, College of Pharmacy - Department of Pharmacy Practice</p> <p>Al Yami, Majed; King Saud bin Abdulaziz University for Health Sciences, College of Pharmacy - Department of Pharmacy Practice</p> <p>Almohammed, Omar; King Saud University, College of Pharmacy - Department of Clinical Pharmacy</p> |
| Keywords:                     | Anticoagulation < HAEMATOLOGY, Myocardial infarction < CARDIOLOGY, Coronary heart disease < CARDIOLOGY, Thromboembolism < CARDIOLOGY, Bleeding disorders & coagulopathies < HAEMATOLOGY                                                                                                                                                                                                                                                                                                                                                                                                                                                                                                                                                                                                                                                                                                                                                                                                                                                                                                                                                  |
|                               |                                                                                                                                                                                                                                                                                                                                                                                                                                                                                                                                                                                                                                                                                                                                                                                                                                                                                                                                                                                                                                                                                                                                          |

SCHOLARONE™  
Manuscripts

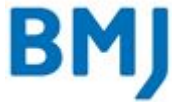

I, the Submitting Author has the right to grant and does grant on behalf of all authors of the Work (as defined in the below author licence), an exclusive licence and/or a non-exclusive licence for contributions from authors who are: i) UK Crown employees; ii) where BMJ has agreed a CC-BY licence shall apply, and/or iii) in accordance with the terms applicable for US Federal Government officers or employees acting as part of their official duties; on a worldwide, perpetual, irrevocable, royalty-free basis to BMJ Publishing Group Ltd ("BMJ") its licensees and where the relevant Journal is co-owned by BMJ to the co-owners of the Journal, to publish the Work in this journal and any other BMJ products and to exploit all rights, as set out in our [licence](#).

The Submitting Author accepts and understands that any supply made under these terms is made by BMJ to the Submitting Author unless you are acting as an employee on behalf of your employer or a postgraduate student of an affiliated institution which is paying any applicable article publishing charge ("APC") for Open Access articles. Where the Submitting Author wishes to make the Work available on an Open Access basis (and intends to pay the relevant APC), the terms of reuse of such Open Access shall be governed by a Creative Commons licence – details of these licences and which [Creative Commons](#) licence will apply to this Work are set out in our licence referred to above.

Other than as permitted in any relevant BMJ Author's Self Archiving Policies, I confirm this Work has not been accepted for publication elsewhere, is not being considered for publication elsewhere and does not duplicate material already published. I confirm all authors consent to publication of this Work and authorise the granting of this licence.

**Title:**

Safety and efficacy of dual vs. triple antithrombotic therapy (DAT vs. TAT) in patients with atrial fibrillation following a PCI: a systematic review and network meta-analysis

**Authors:**

Renad M Altoukhi<sup>1</sup>

Reema A Alshouimi<sup>1</sup>

Shahad M Al Rammah<sup>1</sup>

Mohammed Y Alzahrani<sup>1</sup>

Abdulaali R Almutairi<sup>2</sup>

Abdulmajeed M Alshehri<sup>1</sup>

Osamah M. Alfayez<sup>3</sup>

Majed S Al Yami<sup>1</sup>

Omar A Almohammed<sup>4</sup>

<sup>1</sup> Department of Pharmacy Practice, College of pharmacy, King Saud bin Abdulaziz University for Health Sciences, Riyadh, Saudi Arabia

<sup>2</sup> Department of Pharmacy Practice and Science; Center for Health Outcomes and Pharmacoeconomic Research, College of Pharmacy, University of Arizona, Tucson, AZ, USA

<sup>3</sup> Department of Pharmacy Practice, College of pharmacy, Qassim University, Qassim, Saudi Arabia

<sup>4</sup> Department of Clinical Pharmacy, College of Pharmacy, King Saud University, Riyadh, Saudi Arabia

**Corresponding author contact information:**

Omar A Almohammed, B.Pharm, PharmD, PhD

Assistant Professor

Department of Clinical Pharmacy

College of Pharmacy - King Saud University

Mobile: +966555104065

E-mail: oalmohammed@ksu.edu.sa

**Word count:**

2232 words

## Abstract

### Objective

Creating an appropriate antithrombotic therapy for patients with atrial fibrillation (AF) who have undergone percutaneous coronary intervention (PCI) remains a dilemma. Several clinical trials compared the use of a dual antithrombotic therapy (DAT) regimen with a direct oral anticoagulants (DOAC) including (apixaban, dabigatran, edoxaban, or rivaroxaban) and a P2Y<sub>12</sub> inhibitor versus a triple antithrombotic therapy (TAT) that includes a vitamin K antagonist (VKA) plus aspirin and a P2Y<sub>12</sub> inhibitor in AF patients who have undergone PCI. However, there are no head-to-head trials comparing the DAT regimens to each other. We aimed to compare the efficacy and safety of DAT regimens using a network meta-analysis (NMA) approach.

### Design

A systematic review and network meta-analysis of randomized clinical trials

### Methods:

We conducted a systematic literature review to identify relevant randomized clinical trials, and performed a Bayesian NMA for International Society on Thrombosis and Haemostasis (ISTH) major or clinically relevant non-major (CRNM) bleeding, all-cause mortality, stroke, myocardial infarction (MI), and stent thrombosis outcomes. We used NetMetaXL 1.6.1 and WinBUGS 1.4.3 for the NMA and estimated the probability of ranking the treatments based on the surface under the cumulative ranking curve.

### Results:

The comparison between DAT regimens showed no significant difference in the safety or efficacy outcomes. Apixaban regimen was ranked first preferred therapy in-terms of ISTH major or CRNM bleeding and stroke, with a probability of 52% and 54%, respectively. Rivaroxaban regimen was the preferred therapy in-terms of MI and stent thrombosis, with a probability of 34% and 27%, respectively. Dabigatran regimen was ranked first in-terms of all-cause mortality, with a probability of 28%.

**Conclusion:**

The DAT regimens are as safe and effective as TAT regimens. However, the marginal superiority among the DOACs can be used to guide the selection among these agents based on different patients' conditions.

**Keywords:**

DAT, TAT, PCI, Anticoagulants, Atrial Fibrillation, Bleeding

**Strengths and limitations of this study:**

- The utilized network meta-analysis technique facilitated the comparison of dual antithrombotic therapy regimens versus triple antithrombotic therapy regimen in patients with AF who have undergone PCI.
- Only randomized clinical trials were included in this network meta-analysis
- All the included studies were of high quality with a low risk of bias
- The results were associated with wide confidence intervals, which might affect the precision of the findings.

## INTRODUCTION

Atrial fibrillation (AF) is a common comorbidity in patients with acute coronary syndrome (ACS) due to similar risk factors. The incidence rate of AF in ACS patients ranges from 5% to 23%.<sup>1-5</sup> Appropriate antithrombotic therapy for patients with AF who had ACS or have undergone percutaneous coronary intervention (PCI) is controversial. In patients with AF, oral anticoagulation is recommended for the prevention of cardioembolic stroke,<sup>6</sup> but its efficacy in preventing stent thrombosis for patients with PCI is not well established.

Dual-antiplatelet therapy (DAPT), with aspirin plus a P2Y<sub>12</sub> inhibitor, is recommended in patients with ACS for secondary prevention of ischemic events and stent thrombosis.<sup>7</sup> Triple therapy, including an oral anticoagulant on top of the DAPT, was recommended by previous guidelines and considered a standard of care for patients with AF who experienced ACS or undergone PCI.<sup>7-8</sup> However, the most recent AHA/ACC/HRS 2019 guidelines suggested the use of dual antithrombotic therapy (DAT: vitamin K antagonist (VKA) or a direct oral anticoagulant (DOAC) plus a P2Y<sub>12</sub> inhibitor) over the triple antithrombotic therapy (TAT: oral anticoagulant, aspirin and a P2Y<sub>12</sub> inhibitor),<sup>6</sup> due to the increased risk of bleeding with the triple therapy that was reported in multiple studies.<sup>9-14</sup>

In an attempt to clarify this controversy, six randomized control trials (WOEST, ISAR-TRIPLE, PIONEER-AF-PCI, RE-DUAL-PCI, AUGUSTUS, and ENTRUST-AF-PCI) were conducted to assess the efficacy and safety of the TAT compared to the DAT for patients with AF receiving oral anticoagulation after experiencing ACS or undergoing PCI.<sup>9-14</sup> Although these trials reported a higher incidence of major bleeding in patients receiving the TAT compared to the DAT without significant differences in the risk of ischemic events, it is noteworthy to recognize that these trials were underpowered to detect ischemic events.

Several observational studies found a higher risk of bleeding with the triple therapy that involved vitamin K antagonist, aspirin and a P2Y<sub>12</sub> inhibitor.<sup>15-17</sup> The objective of this network meta-analysis is to assess the safety and efficacy of a DAT regimen with a DOAC versus a TAT regimen with a VKA in patients with AF who experienced ACS or undergone PCI.

## METHODS

A systemic literature search was conducted on MEDLINE and Embase through October, 2019 to identify randomized clinical trials that evaluated the use of DOACs in patients with AF who experienced ACS or undergone PCI. The search terms included percutaneous coronary intervention, PCI, atrial fibrillation, acute coronary syndrome, ACS, stent, anticoagulants, rivaroxaban, edoxaban, apixaban, dabigatran, DOACs, vitamin K antagonist, VKA, warfarin, aspirin, clopidogrel, triple therapy, double therapy, dual antithrombotic therapy, DAT, triple antithrombotic therapy, and TAT. We also searched for other systematic reviews and meta-analyses and reviewed their references to identify any relevant studies. The search was limited to studies that were published in English within the last ten years.

For each study, episodes of major or clinically relevant non-major (CRNM) bleeding events based on the International Society on Thrombosis and Haemostasis (ISTH) definition,<sup>18</sup> all-cause mortality, stroke, myocardial infarction (MI), stent thrombosis were extracted. Data were extracted from the published studies and assessed for eligibility by two independent investigators (RMA and RAM) and verified by a third investigator (OAA). The risk of bias assessment was conducted for each study using the Cochrane Collaboration risk of bias assessment tool.<sup>19</sup> A Bayesian network meta-analysis (NMA) was conducted for the pre-specified outcomes using NetMetaXL 1.6.1 (Canadian Agency for Drugs and Technologies in Health, Ottawa, Canada)<sup>20</sup> and WinBUGS 1.4.3 (MRC Biostatistics Unit, Cambridge, United Kingdom). We utilized the random effect binomial model with vague priors and employing Markov chain Monte Carlo simulation for 60000 iterations after discarding 30000 iteration as burn-in simulations initially. Estimates of the outcomes were presented in odds ratio (OR) and 95% credible intervals (95% CrI). Also, we estimated the probability of ranking the treatments based on the surface under the cumulative ranking curve.<sup>21</sup> We reported this NMA according to the preferred reporting items for systematic reviews and meta-analyses for network meta-analyses (PRISMA-NMA).<sup>22</sup>



## RESULTS

A total of 662 articles were identified in the systematic search. Four studies, PIONEER-AF PCI, RE-DUAL PCI, AUGUSTUS, and ENTRUST-AF PCI, met the inclusion criteria, and were included in the current NMA.<sup>11-14</sup> The flowchart in Figure 1 illustrates the process of including and excluding articles for this NMA. The risk of bias assessment of the included trials showed low risk of bias (Supplementary Table 1).

### Summary of the included trials

The trials that were included demonstrated favorable results for the pre-specified outcomes towards DOACs when mainly used in a DAT regimen in combination with a P2Y<sub>12</sub> inhibitor only.<sup>11-14</sup> The PIONEER AF-PCI trial was the first to be conducted to compare the safety and efficacy of using DOACs agent in a DAT regimen to TAT regimen. A DAT regimen including low-dose rivaroxaban (15 mg once daily) in combination with a P2Y<sub>12</sub> inhibitor (group 1) was compared to a TAT regimen that included P2Y<sub>12</sub> inhibitor and aspirin in combination with either a very low dose rivaroxaban (2.5 mg twice daily; group 2) or VKA (group 3). The study found the bleeding rates were significantly reduced for groups 1 and 2 compared to group 3 (16.8%, 18.0%, and 26.7%, respectively; hazard ratio [HR] for group 1 vs. 3 =0.59; 95%CI 0.47–0.76; HR for group 2 vs. 3 =0.63; 95%CI 0.50–0.80). However, the rivaroxaban dose that was used in the trial is lower than the recommended daily dose for stroke prevention in atrial fibrillation (20 mg), and the very low dose was not included in the NMA.<sup>11</sup>

The RE-DUAL PCI study was conducted to compare the safety and efficacy of using dabigatran (110 or 150 mg twice daily) in a DAT regimen with a P2Y<sub>12</sub> inhibitor to a TAT regimen that included P2Y<sub>12</sub> inhibitor and aspirin in combination with a VKA. The findings of the study demonstrated a significantly lower risk of bleeding for the DAT regimen that included dabigatran to the TAT regimen (HR =0.52; 95%CI 0.42–0.63; P<0.001 for superiority).<sup>12</sup> However, it is to be noted that both studies, the PIONEER AF-PCI and RE-DUAL PCI, were not powered to detect any significant disparities in efficacy between the DOACs and VKA.

1  
2  
3 The AUGUSTUS trial compared the use of apixaban to a VKA along with clopidogrel  
4 and aspirin to a placebo using a 2x2 factorial design. The study concluded that a DAT regimen  
5  
6 with apixaban and clopidogrel only was both non-inferior and superior to a TAT regimen in-  
7  
8 terms of reducing the risk of major or CRNM bleeding (HR =0.69; 95%CI 0.58–0.81;  $p<0.001$   
9  
10 for both non-inferiority and superiority), while there was no difference in the ischemic event  
11  
12 outcomes.<sup>13</sup>  
13  
14  
15  
16

17  
18 The most recent, ENTRUST-AF PCI trial was designed to assess a DAT regimen, that  
19  
20 included edoxaban plus a P2Y<sub>12</sub> inhibitor, to a TAT regimen, that included a VKA plus P2Y<sub>12</sub>  
21  
22 inhibitor and aspirin. Similar to the previous trials, they found a lower rate of bleeding in the  
23  
24 DAT regimen in comparison to the TAT regimen (HR =0.83, 95%CI 0.65–1.05;  $p=0.0010$  for  
25  
26 non-inferiority). However, unlike other DOACs, the trial found the edoxaban regimen to be  
27  
28 non-inferior, but not superior to the TAT regimen.<sup>14</sup>  
29  
30  
31  
32

### 33 **Network meta-analysis**

#### 34 **Demographic characteristics**

35  
36 A total of 7,890 patients were included in the NMA. The mean age for the included  
37  
38 patients ranged between 68 and 71 years, and about 22 to 30% of participants were females.  
39  
40 The detailed patients' demographics and outcomes from the included studies were presented  
41  
42 in Table 1.  
43  
44  
45  
46  
47

#### 48 **ISTH major or CRNM bleeding**

49  
50 There were no significant differences between all DOACs when used in DAT regimens  
51  
52 as well as when compared to TAT regimen, using VKA. Among all, DAT regimen containing  
53  
54 apixaban was the preferred one, with a probability of 52%, followed by regimens containing  
55  
56 dabigatran or rivaroxaban, with a probability of 18% and 17.9%, respectively (Figure 2).  
57  
58  
59  
60

### All-cause mortality

The NMA showed no differences between all DAT regimens containing DOACs as well as between DAT and TAT regimens in regard to all-cause mortality. However, the ranking of DAT regimens showed that dabigatran regimen was the preferred agent, followed by apixaban regimen, and rivaroxaban regimen with a probability of 28%, 21.5%, and 20.8%, respectively (Figure 3 [A], Supplementary Figure 1).

### Stroke

Similar to all-cause mortality, the results of the NMA showed no significant difference between the DOACs when used in DAT regimen, and when compared to the TAT regimen, with VKA. Apixaban DAT regimen was ranked first, followed by regimens of edoxaban and rivaroxaban with a probability of 54%, 19.5%, and 12.4%, respectively (Figure 3 [B], Supplementary Figure 2).

### Myocardial infarction (MI)

There were no significant differences between all DOACs in the DAT regimens compared to each other or to the TAT regimen, with VKA. Rivaroxaban DAT regimen was the preferred regimen, followed by apixaban regimen and edoxaban regimen, with a probability of 34%, 22%, and 18%, respectively (Figure 4 [A], Supplementary Figure 3).

### Stent thrombosis

The odds of stent thrombosis were similar across all DAT regimens with DOACs and TAT regimen, with rivaroxaban DAT regimen being the preferred regimen with a probability of 27% and followed by edoxaban regimen with a probability of 23% (Figure 4 [B], Supplementary figure 4).

## DISCUSSION

For patients with atrial fibrillation who experienced ACS or undergone PCI, the selection of a regimen that is both effective in preventing stroke and stent thrombosis while minimizing the risk of bleeding remains a challenge for prescribers. The main focus of this NMA was to estimate the efficacy and safety of different DOACs in DAT regimens compared to each other and to VKA in a TAT regimen for patients with AF who undergone PCI, and to rank the DOACs in terms of difference in the efficacy and safety outcomes. We looked at five main end points, which were ISTH major or CRNM bleeding, all-cause mortality, stroke, MI, and stent thrombosis.

Our results showed no significant difference between a DAT regimen with a DOAC compared to a TAT regimen with a VKA for all the specified outcomes. This demonstrates that the DAT regimen with DOACs is just as safe and effective as the TAT regimen with a VKA. However, apixaban regimen was the preferred option in reducing the risk of major or CRNM bleeding and stroke, dabigatran regimen was ranked as first option in the reduction of all-cause mortality, and rivaroxaban regimen was the preferred in-term of reducing the risk of MI and stent thrombosis. Based on this ranking, VKA was ranked the lowest in comparison to all DOACs' DAT regimens in terms of bleeding, all-cause mortality, and MI. A previous NMA by Lopes et al. presented similar results, but in their NMA, there was a significant difference between the DAT and the TAT regimens with a more favorable outcome in terms of safety for the regimen that includes a DOAC and a P2Y<sub>12</sub> inhibitor.<sup>23</sup>

The 2016 European Society of Cardiology (ESC) guidelines for the management of AF recommended to initiate the patients' management on the triple therapy that includes an oral anticoagulant (OAC) with aspirin and clopidogrel in the first month of treatment after PCI, or to an extended period of 6 months in case of lower risk of bleeding; then, to continue with a dual therapy (OAC plus aspirin or clopidogrel) for 6 to 12 months, and lifetime therapy on an OAC.<sup>8</sup> Only aspirin and clopidogrel were recommended as antiplatelet therapy as opposed to third generation P2Y<sub>12</sub> inhibitors due to the increased risk of bleeding and lack of evidence. If

1  
2  
3 a DOAC is chosen for anticoagulation, then the lowest effective dose for stroke prevention  
4 should be used. However, a regimen of low-dose rivaroxaban plus clopidogrel and aspirin is  
5 not recommended for stroke prevention in atrial fibrillation.<sup>8</sup> In the recent AHA/ACC/HRS  
6 2019 guidelines for the management of AF in patients who had undergone PCI, the guidelines  
7 favored the DAT over the TAT; for patients with an increased risk of stroke based on their  
8 CHA<sub>2</sub>DS<sub>2</sub>-VASc who should be initiated on triple therapy (OAC plus P2Y<sub>12</sub> inhibitor plus  
9 aspirin), it is recommended to transition them to double therapy at the 4<sup>th</sup> to 6<sup>th</sup> week of  
10 treatment.<sup>6</sup> However, no recommendations were made in such population regarding the use of  
11 apixaban and edoxaban due to the lack of data on these agents at that time.

22  
23 The results of this NMA align with the findings of previous studies that demonstrates  
24 the sufficiency of the DAT regimen for the prevention of stroke in patients with AF who  
25 experienced ACS or undergone PCI, with the added benefit of having a reduced risk of bleeding  
26 in those patients.<sup>12 9 11 13 10 14</sup> There are some limitations to this NMA. The prominent variation  
27 in the design, the length of follow-up period, and sample sizes between the included trials could  
28 have possibly contributed to the wide confidence interval and the lack of significance in our  
29 analysis. Therefore, the findings should be used with caution until a large direct comparison  
30 studies among DOACs are conducted or findings from retrospective studies become available  
31 to support this evidence. Perhaps future studies could look more into patient specific outcomes  
32 that could be based on differences in terms of sex, age group, presence of other comorbidities,  
33 genetic variations, and other P2Y<sub>12</sub> inhibitors.

## 46 47 **Conclusion**

48  
49 The DAT regimens with DOACs are as safe and effective as the TAT regimen with  
50 VKA. Moreover, DOACs in DAT regimens were associated with a marginal superiority over  
51 VKA in a TAT regimen. This marginal benefit can be used to guide the selection among  
52 different DOACs agents based on patients' conditions, until evidence from large and direct  
53 comparison studies become available.

## References

1. Lopes RD, Pieper KS, Horton JR et al. Short-and long-term outcomes following atrial fibrillation in patients with acute coronary syndromes with or without ST-segment elevation. *Heart* 2008;94(7):867-73 doi:10.1136/hrt.2007.134486
2. Mehta RH, Dabbous OH, Granger CB et al. Comparison of outcomes of patients with acute coronary syndromes with and without atrial fibrillation. *Am J Cardiol* 2003;92(9):1031-6 doi:10.1016/j.amjcard.2003.06.001
3. Saczynski JS, McManus D, Zhou Z et al. Trends in atrial fibrillation complicating acute myocardial infarction. *Am J Cardiol* 2009;104(2):169-74 doi:10.1016/j.amjcard.2009.03.011
4. Schmitt J, Duray G, Gersh BJ et al. Atrial fibrillation in acute myocardial infarction: a systematic review of the incidence, clinical features and prognostic implications. *Eur Heart J* 2008;30(9):1038-45 doi:10.1093/eurheartj/ehn579
5. Tsang TS, Miyasaka Y, Barnes ME et al. Epidemiological profile of atrial fibrillation: a contemporary perspective. *Prog Cardiovasc Dis* 2005;1(48):1-8 doi:10.1016/j.pcad.2005.06.001
6. January CT, Wann LS, Calkins H et al. 2019 AHA/ACC/HRS Focused update of the 2014 AHA/ACC/HRS guideline for the management of patients with atrial fibrillation: a report of the American College of Cardiology/American Heart Association task force on clinical practice guidelines and the heart rhythm society. *Heart Rhythm* 2019;10.1016/j.hrthm.2019.01.024
7. Amsterdam EA, Wenger NK, Brindis RG et al. 2014 AHA/ACC guideline for the management of patients with non-ST-elevation acute coronary syndromes. *Circulation* 2014;130(25):e344-e426 doi:10.1016/j.jacc.2014.09.017
8. Kirchhof P, Benussi S, Kotecha D et al. 2016 ESC Guidelines for the management of atrial fibrillation developed in collaboration with EACTS. *Kardiol Pol* 2016;74(12):2893-962 doi:10.1161/CIR.0000000000000134
9. Dewilde WJ, Oirbans T, Verheugt FW et al. Use of clopidogrel with or without aspirin in patients taking oral anticoagulant therapy and undergoing percutaneous coronary intervention: an open-label, randomised, controlled trial. *Lancet* 2013;381(9872):1107-15 doi:10.1016/s0140-6736(12)62177-1
10. Fiedler KA, Maeng M, Mehilli J et al. Duration of triple therapy in patients requiring oral anticoagulation after drug-eluting stent implantation: the ISAR-TRIPLE trial. *J Am Coll Cardiol* 2015;65(16):1619-29 doi:10.1016/j.jacc.2015.02.050
11. Gibson CM, Mehran R, Bode C et al. Prevention of bleeding in patients with atrial fibrillation undergoing PCI. *N Engl J Med* 2016;375(25):2423-34 doi:10.1056/NEJMoa1611594
12. Cannon CP, Bhatt DL, Oldgren J et al. Dual antithrombotic therapy with dabigatran after PCI in atrial fibrillation. *N Engl J Med* 2017;377(16):1513-24 doi:10.1056/NEJMoa1708454
13. Lopes RD, Heizer G, Aronson R et al. Antithrombotic therapy after acute coronary syndrome or PCI in atrial fibrillation. *N Engl J Med* 2019;18(380):1509-24 doi:10.1056/NEJMoa1817083
14. Vranckx P, Valgimigli M, Eckardt L et al. Edoxaban-based versus vitamin K antagonist-based antithrombotic regimen after successful coronary stenting in patients with atrial fibrillation (ENTRUST-AF PCI): a randomised, open-label, phase 3b trial. *Lancet* 2019;394(10206):1335-43 doi:10.1016/s0140-6736(19)31872-0

- 1  
2  
3 15. Hansen ML, Sorensen R, Clausen MT et al. Risk of bleeding with single, dual, or triple  
4 therapy with warfarin, aspirin, and clopidogrel in patients with atrial fibrillation. *Arch Intern*  
5 *Med* 2010;170(16):1433-14441 doi:10.1001/archinternmed.2010.271  
6  
7 16. Lopes RD, Rao M, Simon DN et al. Triple vs dual antithrombotic therapy in patients with  
8 atrial fibrillation and coronary artery disease. *Am J Med* 2016;129(6):592-9  
9 doi:10.1016/j.amjmed.2015.12.026  
10  
11 17. Sorensen R, Hansen ML, Abildstrom SZ et al. Risk of bleeding in patients with acute  
12 myocardial infarction treated with different combinations of aspirin, clopidogrel, and  
13 vitamin K antagonists in Denmark: a retrospective analysis of nationwide registry data.  
14 *Lancet* 2009;374(9706):1967-74 doi:10.1016/S0140-6736(09)61751-7  
15  
16 18. Mehran R, Rao SV, Bhatt DL et al. Standardized bleeding definitions for cardiovascular  
17 clinical trials: a consensus report from the Bleeding Academic Research Consortium.  
18 *Circulation* 2011;123(23):2736-47 doi:10.1161/circulationaha.110.009449  
19  
20 19. Higgins JPT, Altman DG, Gøtzsche PC et al. The Cochrane Collaboration's tool for  
21 assessing risk of bias in randomised trials. *BMJ* 2011;34310.1136/bmj.d5928  
22  
23 20. Brown S, Hutton B, Clifford T et al. A Microsoft-Excel-based tool for running and critically  
24 appraising network meta-analyses--an overview and application of NetMetaXL. *Syst Rev*  
25 2014;310.1186/2046-4053-3-110  
26  
27 21. Salanti G, Ades AE, Ioannidis JP Graphical methods and numerical summaries for  
28 presenting results from multiple-treatment meta-analysis: an overview and tutorial. *J Clin*  
29 *Epidemiol* 2011;64(2):163-71 doi:10.1016/j.jclinepi.2010.03.016  
30  
31 22. Hutton B, Salanti G, Caldwell DM et al. The PRISMA extension statement for reporting of  
32 systematic reviews incorporating network meta-analyses of health care interventions:  
33 checklist and explanations. *Ann Intern Med* 2015;162(11):777-84 doi:10.7326/m14-2385  
34  
35 23. Lopes RD, Hong H, Harskamp RE et al. Safety and efficacy of antithrombotic strategies in  
36 patients with atrial fibrillation undergoing percutaneous coronary intervention: a network  
37 meta-analysis of randomized controlled trials. *JAMA Cardiol* 2019;4(8):747-55  
38 doi:10.1001/jamacardio.2019.1880  
39

## Footnotes:

- 40  
41  
42  
43  
44  
45  
46  
47  
48  
49  
50  
51  
52  
53  
54  
55  
56  
57  
58  
59  
60
- **Contributors** RMA, RAA, SMA conducted the systematic literature search, extracted the data and participated in drafting the manuscript. MYA, AMA, ARA, OMA, MSA, and OAA contributed to the study design, as well as the analysis and interpretation of the results, drafting the manuscript and approving the final manuscript.
  - **Funding** This work was supported by the Researcher Supporting Project number (RSP-2019/77), King Saud University, Riyadh, Saudi Arabia for supporting the conduction and publication of this research.
  - **Competing interests** None declared
  - **Provenance and peer review** Not commissioned; externally peer reviewed.
  - **Data availability statement** All data relevant to the study are included in the article or uploaded as supplementary information.

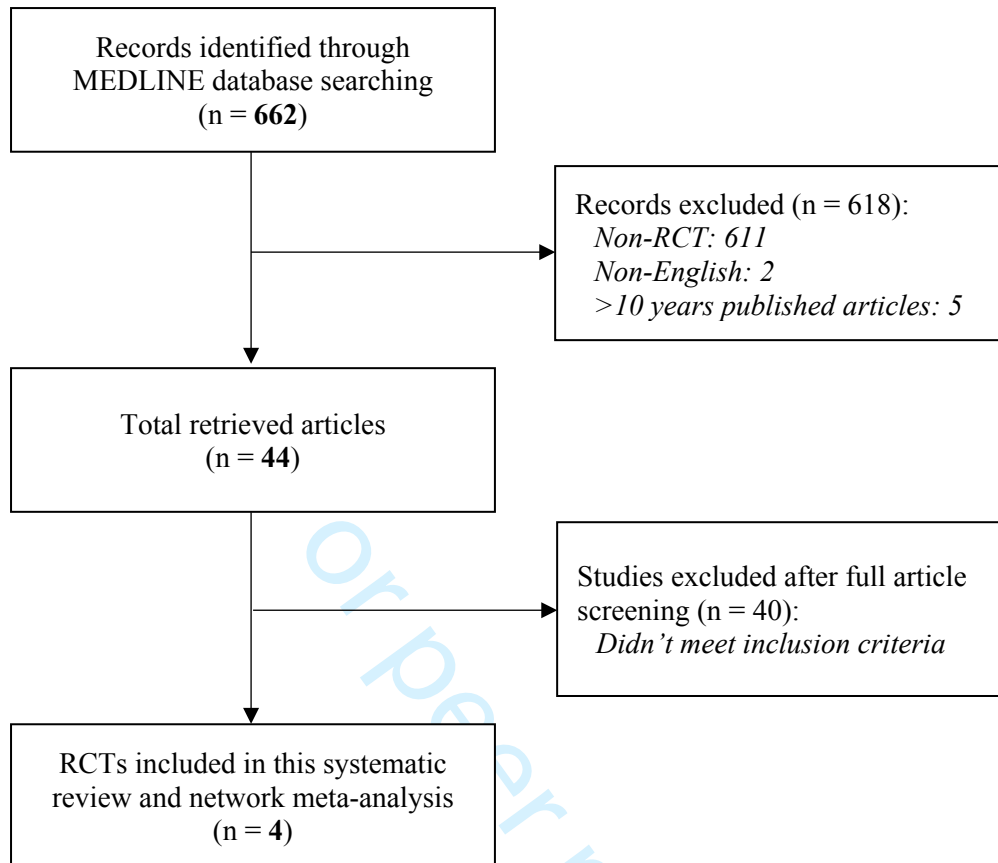

**Figure 1:** Flow diagram for studies included in the network meta-analysis



**Table 1:** Patients' demographics and outcomes from the included randomized controlled trials

| Name of the Study               | PIONEER AF-PCI* <sup>11</sup>   |                                          | RE-DUAL PCI <sup>12</sup>       |                                          | AUGUSTUS* <sup>13</sup>         |                                          | ENTRUST-AF-PCI <sup>14</sup>    |                                          |
|---------------------------------|---------------------------------|------------------------------------------|---------------------------------|------------------------------------------|---------------------------------|------------------------------------------|---------------------------------|------------------------------------------|
| Relevant Groups in the Study    | DAT<br>Riva+P2Y <sub>12</sub> i | TAT<br>VKA+ P2Y <sub>12</sub> i<br>+ ASA | DAT<br>Dabi+P2Y <sub>12</sub> i | TAT<br>VKA+ P2Y <sub>12</sub> i<br>+ ASA | DAT<br>Apix+P2Y <sub>12</sub> i | TAT<br>VKA+ P2Y <sub>12</sub> i<br>+ ASA | DAT<br>Edox+P2Y <sub>12</sub> i | TAT<br>VKA+ P2Y <sub>12</sub> i<br>+ ASA |
| <i>n</i>                        | 696                             | 697                                      | 1744                            | 981                                      | 1143                            | 1123                                     | 751                             | 755                                      |
| <b>Baseline Characteristics</b> |                                 |                                          |                                 |                                          |                                 |                                          |                                 |                                          |
| Age (years, SD or IQR)          | 70.4 (9.1)                      | 69.9 (8.7)                               | 70.2 (8.4)                      | 71.7 (8.9)                               | 70.6 (64 - 77)                  | 70.8 (64 - 77)                           | 69 (63 – 77)                    | 70 (64 – 77)                             |
| Female (%)                      | 25.5%                           | 26.6%                                    | 24.3%                           | 23.5%                                    | 27.8%                           | 30.2%                                    | 26.0%                           | 25.4%                                    |
| <i>Risk Factors:</i>            |                                 |                                          |                                 |                                          |                                 |                                          |                                 |                                          |
| Diabetes (%)                    | 28.8%                           | 31.3%                                    | 35.7%                           | 37.9%                                    | 36.2%                           | 36.5%                                    | 34.5%                           | 34.2%                                    |
| Hypertension (%)                | 73.3%                           | 75.4%                                    | NR                              | NR                                       | 88.5%                           | 88.0%                                    | 90.0%                           | 91.0%                                    |
| Dyslipidemia (%)                | 42.6%                           | 44.8%                                    | NR                              | NR                                       | NR                              | NR                                       | 66.2%                           | 64.1%                                    |
| History of MI (%)               | 19.8%                           | 22.2%                                    | 24.7%                           | 27.3%                                    | NR                              | NR                                       | 25.0%                           | 23.4%                                    |
| <i>Type of index event (%)</i>  |                                 |                                          |                                 |                                          |                                 |                                          |                                 |                                          |
| ACS                             | 51.5%                           | 52.2%                                    | 51.6%                           | 48.4%                                    | 61.7%                           | 60.7%                                    | 51.7%                           | 51.5%                                    |
| Non-ACS                         | 48.5%                           | 47.8%                                    | 48.4%                           | 51.6%                                    | 38.3%                           | 39.3%                                    | 48.3%                           | 48.5%                                    |
| <b>Outcomes</b>                 |                                 |                                          |                                 |                                          |                                 |                                          |                                 |                                          |
| Major or CRNM bleeding (ISTH)   | 16.8%                           | 25.5%                                    | 17%                             | 27%                                      | 7.3%                            | 18.7%                                    | 17%                             | 20%                                      |
| Death from any cause            | 2.3%                            | 1.9%                                     | 4.9%                            | 4.9%                                     | 3.4%                            | 2.9%                                     | 6.1%                            | 4.9%                                     |
| MI                              | 3.0%                            | 3.5%                                     | 4.0%                            | 3.0%                                     | 3.3%                            | 2.9%                                     | 3.9%                            | 3.0%                                     |
| Stroke                          | 1.3%                            | 1.2%                                     | 1.5%                            | 1.3%                                     | 0.4%                            | 1.0%                                     | 1.3%                            | 1.6%                                     |
| Stent thrombosis                | 0.8%                            | 0.7%                                     | 1.3%                            | 0.8%                                     | 1.8%                            | 1.0%                                     | 1.7%                            | 1.3%                                     |

\*The patients' baseline characteristics for these studies are based on the overall population in the studies

DAT: Dual antithrombotic therapy, TAT: Triple antithrombotic therapy, Riva: Rivaroxaban, Dabi: Dabigatran, Apex: Apixaban, Edox: Edoxaban, VKA: Vitamin K antagonist, P2Y<sub>12</sub>i: P2Y<sub>12</sub> inhibitors, ASA: Aspirin, MI: Myocardial infarction, CRNM: Clinically relevant non-major, ISTH: International Society on Thrombosis and Haemostasis, NR: Not reported

|                                     |                                                    |                                             |                                     |                                          |
|-------------------------------------|----------------------------------------------------|---------------------------------------------|-------------------------------------|------------------------------------------|
| <b>Apixaban + P2Y<sub>12</sub>i</b> |                                                    |                                             |                                     |                                          |
| 0.59<br>(0.02 – 20.88)              | <b>Dabigatran (110/150 mg) + P2Y<sub>12</sub>i</b> |                                             |                                     |                                          |
| 0.58<br>(0.02 – 20.55)              | 0.98<br>(0.03 – 34.48)                             | <b>Rivaroxaban (LD) + P2Y<sub>12</sub>i</b> |                                     |                                          |
| 0.42<br>(0.01 – 14.90)              | 0.71<br>(0.02 – 25.50)                             | 0.73<br>(0.02 – 25.58)                      | <b>Edoxaban + P2Y<sub>12</sub>i</b> |                                          |
| 0.34<br>(0.03 – 4.34)               | 0.58<br>(0.05 – 7.13)                              | 0.59<br>(0.05 – 7.46)                       | 0.81<br>(0.07 – 10.28)              | <b>VKA + P2Y<sub>12</sub>i + Aspirin</b> |

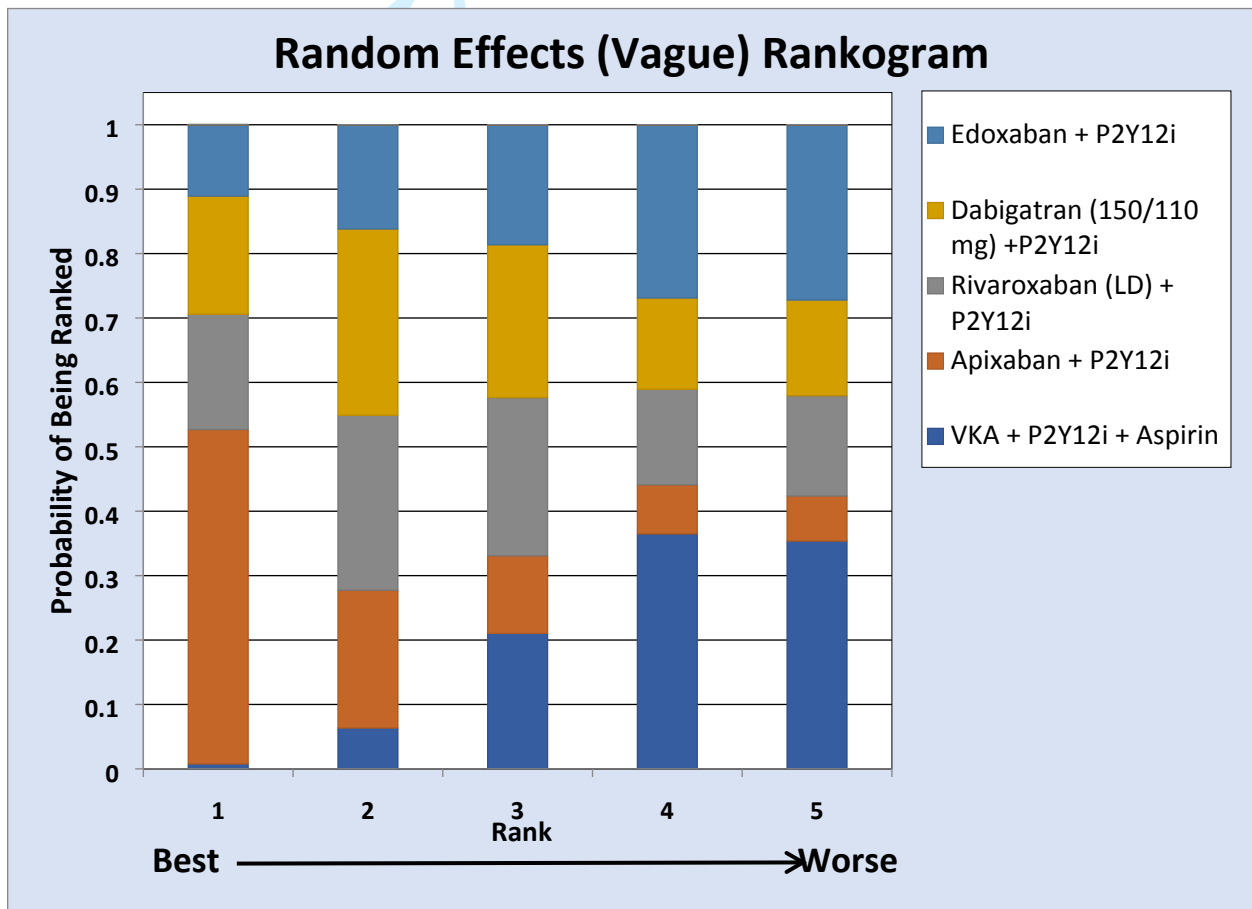

**Figure 2:** The network meta-analysis and the rankogram results for the International Society on Thrombosis and Haemostasis (ISTH) major or clinically relevant non-major (CRNM) bleeding.

Estimates are presented in odds ratio (OR) and 95% credible intervals (95% CrI). VKA: Vitamin K antagonist, P2Y<sub>12</sub>i: P2Y<sub>12</sub> inhibitor, LD: Low dose

|                                              |                                                            |                                         |                                                 |                                         |
|----------------------------------------------|------------------------------------------------------------|-----------------------------------------|-------------------------------------------------|-----------------------------------------|
| <b>VKA<br/>+ P2Y<sub>12</sub>i + Aspirin</b> |                                                            |                                         |                                                 |                                         |
| 1.00<br>(0.08 – 12.33)                       | <b>Dabigatran<br/>(110/150 mg)<br/>+ P2Y<sub>12</sub>i</b> |                                         |                                                 |                                         |
| 0.87<br>(0.07 – 11.19)                       | 0.87<br>(0.02 – 31.42)                                     | <b>Apixaban<br/>+ P2Y<sub>12</sub>i</b> |                                                 |                                         |
| 0.80<br>(0.06 – 11.00)                       | 0.80<br>(0.02 – 30.36)                                     | 0.93<br>(0.03 – 35.56)                  | <b>Rivaroxaban (LD)<br/>+ P2Y<sub>12</sub>i</b> |                                         |
| 0.79<br>(0.06 – 10.21)                       | 0.79<br>(0.02 – 29.03)                                     | 0.91<br>(0.02 – 33.73)                  | 0.99<br>(0.03 – 37.82)                          | <b>Edoxaban<br/>+ P2Y<sub>12</sub>i</b> |

(A) All-cause mortality

|                                         |                                         |                                              |                                                 |                                                            |
|-----------------------------------------|-----------------------------------------|----------------------------------------------|-------------------------------------------------|------------------------------------------------------------|
| <b>Apixaban<br/>+ P2Y<sub>12</sub>i</b> |                                         |                                              |                                                 |                                                            |
| 0.48<br>(0.01 – 19.86)                  | <b>Edoxaban<br/>+ P2Y<sub>12</sub>i</b> |                                              |                                                 |                                                            |
| 0.40<br>(0.03 – 5.70)                   | 0.83<br>(0.06 – 11.41)                  | <b>VKA<br/>+ P2Y<sub>12</sub>i + Aspirin</b> |                                                 |                                                            |
| 0.34<br>(0.01 – 14.68)                  | 0.71<br>(0.02 – 30.36)                  | 0.86<br>(0.06 – 12.35)                       | <b>Rivaroxaban (LD)<br/>+ P2Y<sub>12</sub>i</b> |                                                            |
| 0.34<br>(0.01 – 13.86)                  | 0.72<br>(0.02 – 28.15)                  | 0.88<br>(0.07 – 11.33)                       | 1.02<br>(0.02 – 40.06)                          | <b>Dabigatran<br/>(110/150 mg)<br/>+ P2Y<sub>12</sub>i</b> |

(B) Stroke

**Figure 3:** The network meta-analysis results for (A) all-cause mortality, and (B) stroke.

Estimates are presented in odds ratio (OR) and 95% credible intervals (95% CrI). VKA: Vitamin K antagonist, P2Y<sub>12</sub>i: P2Y<sub>12</sub> inhibitor, LD: Low dose.

|                                              |                                                 |                                         |                                                            |                                         |
|----------------------------------------------|-------------------------------------------------|-----------------------------------------|------------------------------------------------------------|-----------------------------------------|
| <b>VKA<br/>+ P2Y<sub>12</sub>i + Aspirin</b> |                                                 |                                         |                                                            |                                         |
| 0.77<br>(0.05 – 12.50)                       | <b>Rivaroxaban (LD)<br/>+ P2Y<sub>12</sub>i</b> |                                         |                                                            |                                         |
| 0.73<br>(0.05 – 10.81)                       | 0.95<br>(0.02 – 48.03)                          | <b>Edoxaban<br/>+ P2Y<sub>12</sub>i</b> |                                                            |                                         |
| 0.62<br>(0.05 – 8.52)                        | 0.81<br>(0.02 – 36.90)                          | 0.85<br>(0.02 – 36.67)                  | <b>Dabigatran<br/>(110/150 mg)<br/>+ P2Y<sub>12</sub>i</b> |                                         |
| 0.56<br>(0.04 – 7.52)                        | 0.72<br>(0.02 – 32.96)                          | 0.76<br>(0.02 – 32.03)                  | 0.90<br>(0.02 – 35.85)                                     | <b>Apixaban<br/>+ P2Y<sub>12</sub>i</b> |

## A) Myocardial infarction

|                                                 |                                              |                                         |                                         |                                                            |
|-------------------------------------------------|----------------------------------------------|-----------------------------------------|-----------------------------------------|------------------------------------------------------------|
| <b>Rivaroxaban (LD)<br/>+ P2Y<sub>12</sub>i</b> |                                              |                                         |                                         |                                                            |
| 0.90<br>(0.07 – 11.95)                          | <b>VKA<br/>+ P2Y<sub>12</sub>i + Aspirin</b> |                                         |                                         |                                                            |
| 0.80<br>(0.02 – 29.72)                          | 0.89<br>(0.07 – 11.55)                       | <b>Apixaban<br/>+ P2Y<sub>12</sub>i</b> |                                         |                                                            |
| 0.71<br>(0.02 – 26.93)                          | 0.79<br>(0.06 – 10.33)                       | 0.89<br>(0.02 – 33.59)                  | <b>Edoxaban<br/>+ P2Y<sub>12</sub>i</b> |                                                            |
| 0.65<br>(0.02 – 25.35)                          | 0.72<br>(0.06 – 9.49)                        | 0.81<br>(0.02 – 30.88)                  | 0.92<br>(0.02 – 35.80)                  | <b>Dabigatran<br/>(110/150 mg)<br/>+ P2Y<sub>12</sub>i</b> |

## B) Stent thrombosis

**Figure 4:** The network meta-analysis results for (A) myocardial infarction, and (B) stent thrombosis.

Estimates are presented in odds ratio (OR) and 95% credible intervals (95% CrI). VKA: Vitamin K antagonist, P2Y<sub>12</sub>i: P2Y<sub>12</sub> inhibitor, LD: Low dose.

**Supplementary Table 1:** Risk of bias for the included randomized controlled trials

|                                                                       | PIONEER AF-PCI | RE-DUAL PCI | AUGUSTUS | ENTRUST AF-PCI |
|-----------------------------------------------------------------------|----------------|-------------|----------|----------------|
| Random sequence generation<br>( <i>Selection bias</i> )               | +              | +           | +        | +              |
| Allocation concealment<br>( <i>Selection bias</i> )                   | +              | +           | +        | +              |
| Blinding of participants and personnel<br>( <i>Performance bias</i> ) | +              | +           | +        | +              |
| Incomplete outcome data<br>( <i>Attrition bias</i> )                  | +              | +           | +        | +              |
| Selective reporting<br>( <i>Reporting bias</i> )                      | +              | +           | +        | +              |
| Other sources of bias                                                 | +              | +           | +        | +              |

(+) denotes low risk of bias, blank denotes unclear risk of bias, and (-) denotes high risk of bias.

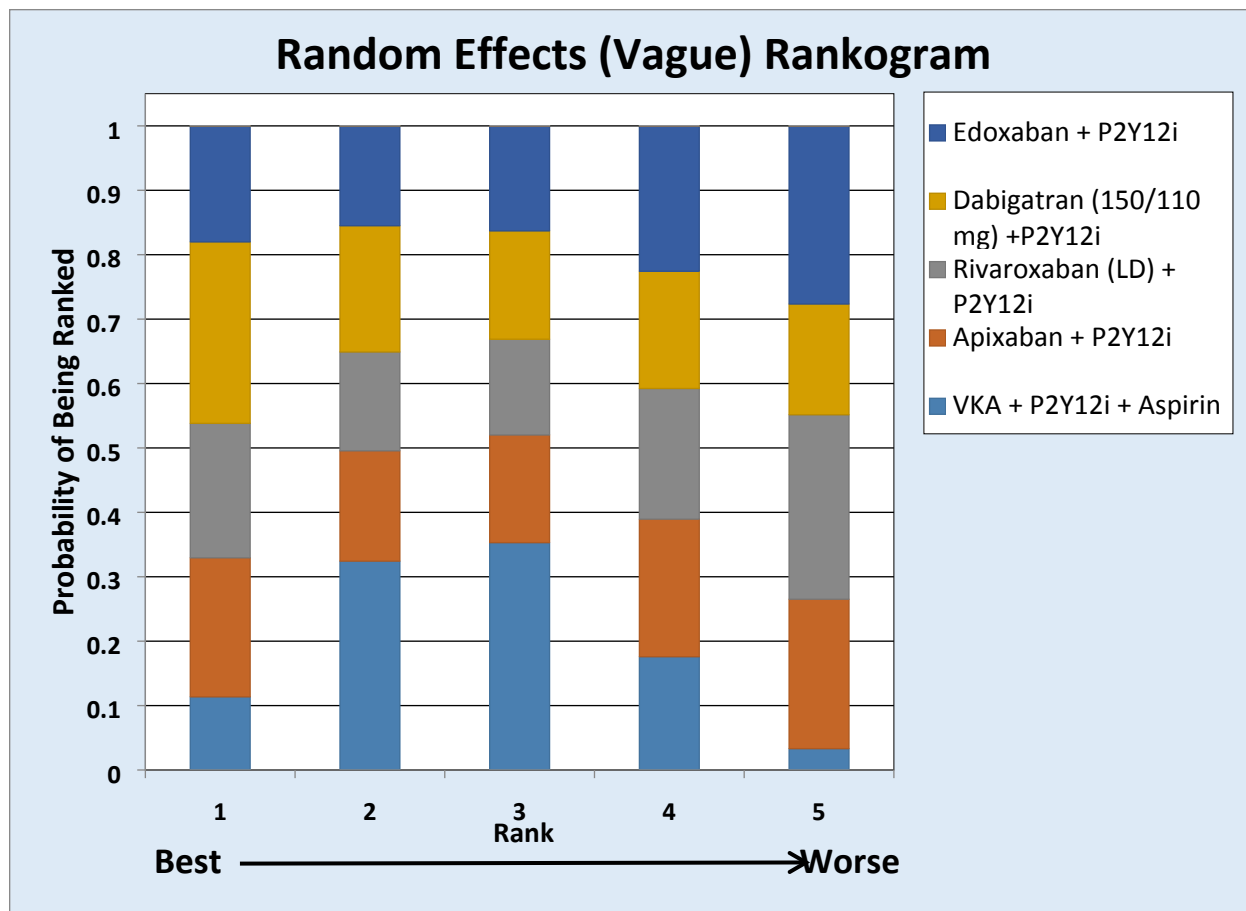

**Supplementary Figure 1:** The rankogram for different agents in the all-cause mortality outcome

VKA: Vitamin K antagonist, P2Y12i: P2Y<sub>12</sub> inhibitor, LD: Low dose.

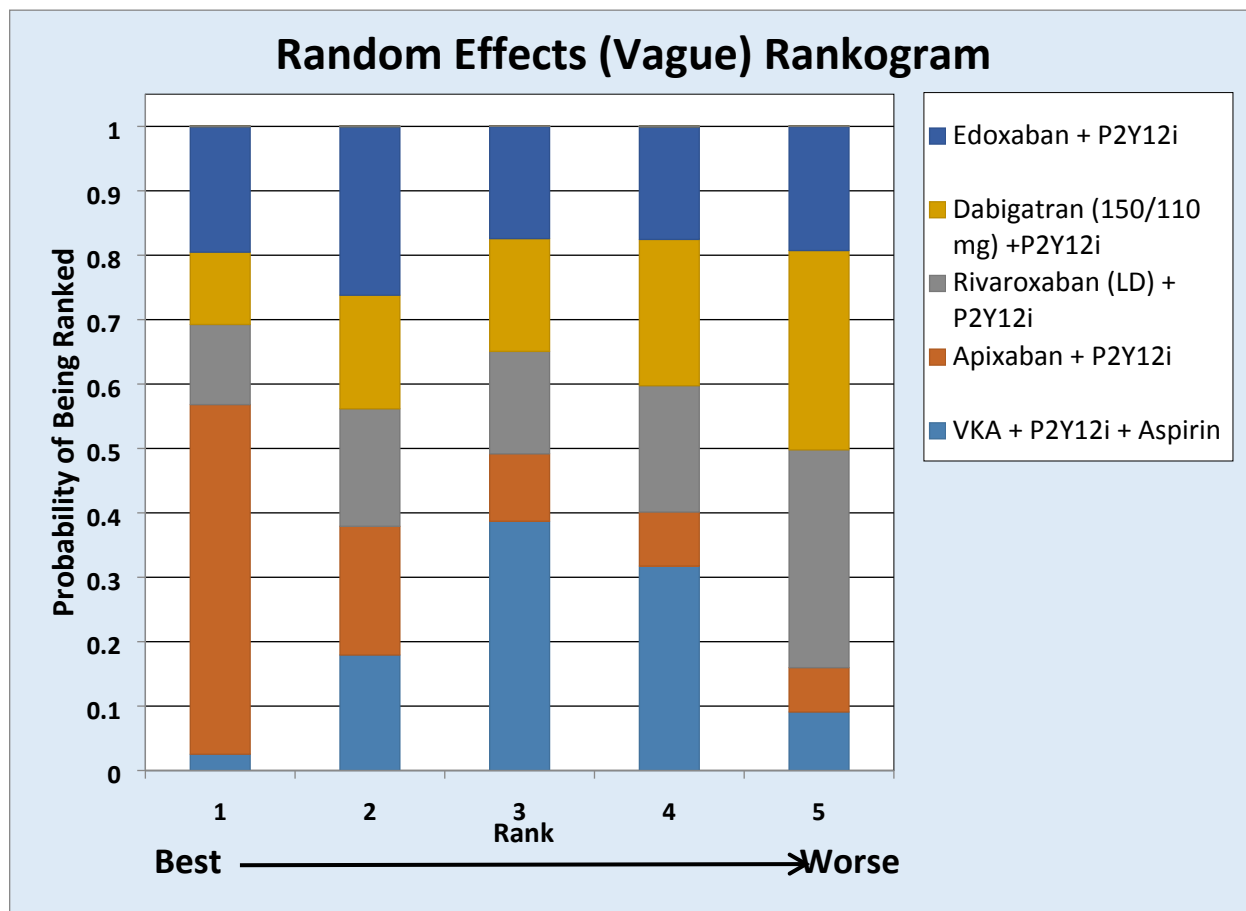

**Supplementary Figure 2:** The rankogram for different agents in the stroke outcome

VKA: Vitamin K antagonist, P2Y12i: P2Y<sub>12</sub> inhibitor, LD: Low dose.

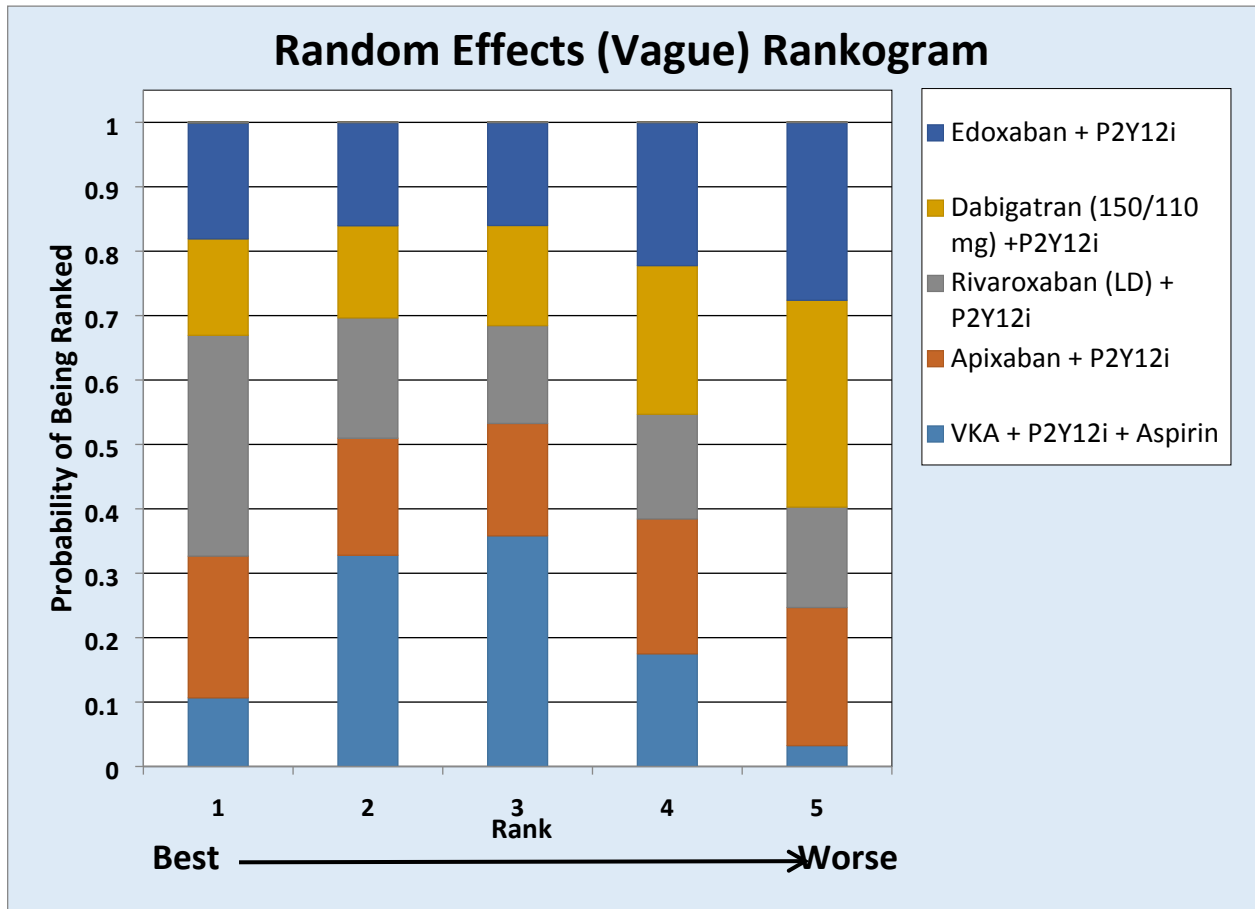

**Supplementary Figure 3:** The rankogram for different agents in the Myocardial Infarction outcome

VKA: Vitamin K antagonist, P2Y12i: P2Y<sub>12</sub> inhibitor, LD: Low dose.



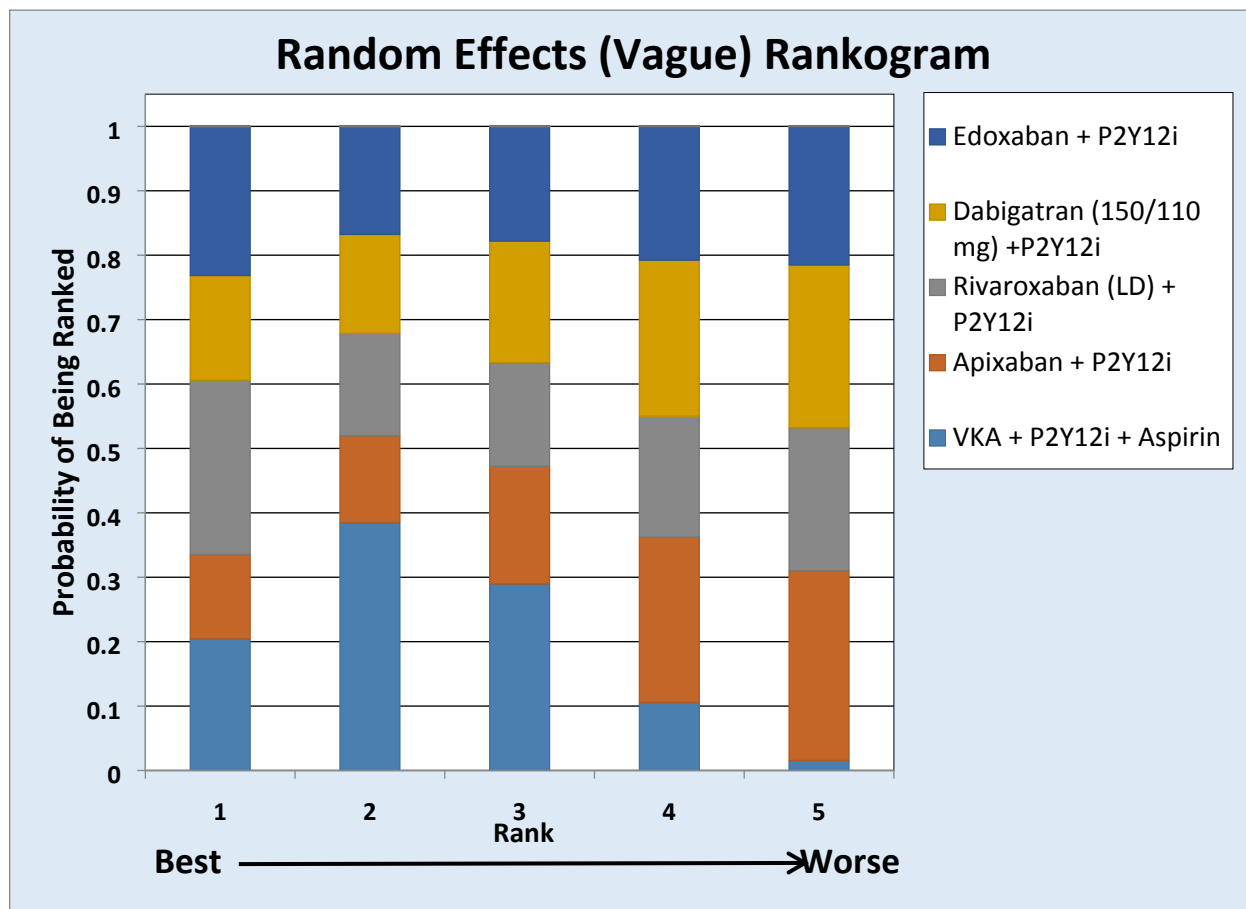

**Supplementary Figure 4:** The rankogram for different agents in the stent thrombosis outcome

VKA: Vitamin K antagonist, P2Y12i: P2Y<sub>12</sub> inhibitor, LD: Low dose.

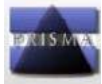

# PRISMA 2009 Checklist

| Section/topic                      | #  | Checklist item                                                                                                                                                                                                                                                                                              | Reported on page # |
|------------------------------------|----|-------------------------------------------------------------------------------------------------------------------------------------------------------------------------------------------------------------------------------------------------------------------------------------------------------------|--------------------|
| <b>TITLE</b>                       |    |                                                                                                                                                                                                                                                                                                             |                    |
| Title                              | 1  | Identify the report as a systematic review, meta-analysis, or both.                                                                                                                                                                                                                                         | 1                  |
| <b>ABSTRACT</b>                    |    |                                                                                                                                                                                                                                                                                                             |                    |
| Structured summary                 | 2  | Provide a structured summary including, as applicable: background; objectives; data sources; study eligibility criteria, participants, and interventions; study appraisal and synthesis methods; results; limitations; conclusions and implications of key findings; systematic review registration number. | 2                  |
| <b>INTRODUCTION</b>                |    |                                                                                                                                                                                                                                                                                                             |                    |
| Rationale                          | 3  | Describe the rationale for the review in the context of what is already known.                                                                                                                                                                                                                              | 4                  |
| Objectives                         | 4  | Provide an explicit statement of questions being addressed with reference to participants, interventions, comparisons, outcomes, and study design (PICOS).                                                                                                                                                  | 5                  |
| <b>METHODS</b>                     |    |                                                                                                                                                                                                                                                                                                             |                    |
| Protocol and registration          | 5  | Indicate if a review protocol exists, if and where it can be accessed (e.g., Web address), and, if available, provide registration information including registration number.                                                                                                                               | NA                 |
| Eligibility criteria               | 6  | Specify study characteristics (e.g., PICOS, length of follow-up) and report characteristics (e.g., years considered, language, publication status) used as criteria for eligibility, giving rationale.                                                                                                      | 5                  |
| Information sources                | 7  | Describe all information sources (e.g., databases with dates of coverage, contact with study authors to identify additional studies) in the search and date last searched.                                                                                                                                  | 5                  |
| Search                             | 8  | Present full electronic search strategy for at least one database, including any limits used, such that it could be repeated.                                                                                                                                                                               | 5                  |
| Study selection                    | 9  | State the process for selecting studies (i.e., screening, eligibility, included in systematic review, and, if applicable, included in the meta-analysis).                                                                                                                                                   | 5                  |
| Data collection process            | 10 | Describe method of data extraction from reports (e.g., piloted forms, independently, in duplicate) and any processes for obtaining and confirming data from investigators.                                                                                                                                  | 5                  |
| Data items                         | 11 | List and define all variables for which data were sought (e.g., PICOS, funding sources) and any assumptions and simplifications made.                                                                                                                                                                       | 5                  |
| Risk of bias in individual studies | 12 | Describe methods used for assessing risk of bias of individual studies (including specification of whether this was done at the study or outcome level), and how this information is to be used in any data synthesis.                                                                                      | 5                  |
| Summary measures                   | 13 | State the principal summary measures (e.g., risk ratio, difference in means).                                                                                                                                                                                                                               | 5                  |
| Synthesis of results               | 14 | Describe the methods of handling data and combining results of studies, if done, including measures of consistency (e.g., $I^2$ ) for each meta-analysis.                                                                                                                                                   | 5                  |

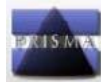

# PRISMA 2009 Checklist

1  
2  
3  
4  
5  
6  
7  
8  
9  
10  
11  
12  
13  
14  
15  
16  
17  
18  
19  
20  
21  
22  
23  
24  
25  
26  
27  
28  
29  
30  
31  
32  
33  
34  
35  
36  
37  
38  
39  
40  
41  
42  
43  
44  
45  
46  
47

| Section/topic                 | #  | Checklist item                                                                                                                                                                                           | Reported on page # |
|-------------------------------|----|----------------------------------------------------------------------------------------------------------------------------------------------------------------------------------------------------------|--------------------|
| Risk of bias across studies   | 15 | Specify any assessment of risk of bias that may affect the cumulative evidence (e.g., publication bias, selective reporting within studies).                                                             | 5                  |
| Additional analyses           | 16 | Describe methods of additional analyses (e.g., sensitivity or subgroup analyses, meta-regression), if done, indicating which were pre-specified.                                                         | NA                 |
| <b>RESULTS</b>                |    |                                                                                                                                                                                                          |                    |
| Study selection               | 17 | Give numbers of studies screened, assessed for eligibility, and included in the review, with reasons for exclusions at each stage, ideally with a flow diagram.                                          | 6                  |
| Study characteristics         | 18 | For each study, present characteristics for which data were extracted (e.g., study size, PICOS, follow-up period) and provide the citations.                                                             | 6, 7               |
| Risk of bias within studies   | 19 | Present data on risk of bias of each study and, if available, any outcome level assessment (see item 12).                                                                                                | 6, S1              |
| Results of individual studies | 20 | For all outcomes considered (benefits or harms), present, for each study: (a) simple summary data for each intervention group (b) effect estimates and confidence intervals, ideally with a forest plot. | 6, 7               |
| Synthesis of results          | 21 | Present results of each meta-analysis done, including confidence intervals and measures of consistency.                                                                                                  | 7, 8               |
| Risk of bias across studies   | 22 | Present results of any assessment of risk of bias across studies (see Item 15).                                                                                                                          | 6, S1              |
| Additional analysis           | 23 | Give results of additional analyses, if done (e.g., sensitivity or subgroup analyses, meta-regression [see Item 16]).                                                                                    | NA                 |
| <b>DISCUSSION</b>             |    |                                                                                                                                                                                                          |                    |
| Summary of evidence           | 24 | Summarize the main findings including the strength of evidence for each main outcome; consider their relevance to key groups (e.g., healthcare providers, users, and policy makers).                     | 9, 10              |
| Limitations                   | 25 | Discuss limitations at study and outcome level (e.g., risk of bias), and at review-level (e.g., incomplete retrieval of identified research, reporting bias).                                            | 10                 |
| Conclusions                   | 26 | Provide a general interpretation of the results in the context of other evidence, and implications for future research.                                                                                  | 10                 |
| <b>FUNDING</b>                |    |                                                                                                                                                                                                          |                    |
| Funding                       | 27 | Describe sources of funding for the systematic review and other support (e.g., supply of data); role of funders for the systematic review.                                                               | 12                 |

From: Moher D, Liberati A, Tetzlaff J, Altman DG, The PRISMA Group (2009). Preferred Reporting Items for Systematic Reviews and Meta-Analyses: The PRISMA Statement. PLoS Med 6(6): e1000097. doi:10.1371/journal.pmed1000097

For more information, visit: [www.prisma-statement.org](http://www.prisma-statement.org).

# BMJ Open

## Safety and efficacy of dual vs. triple antithrombotic therapy (DAT vs. TAT) in patients with atrial fibrillation following a PCI: a systematic review and network meta-analysis

|                                 |                                                                                                                                                                                                                                                                                                                                                                                                                                                                                                                                                                                                                                                                                                                                                                                                                                                                                                                                                                       |
|---------------------------------|-----------------------------------------------------------------------------------------------------------------------------------------------------------------------------------------------------------------------------------------------------------------------------------------------------------------------------------------------------------------------------------------------------------------------------------------------------------------------------------------------------------------------------------------------------------------------------------------------------------------------------------------------------------------------------------------------------------------------------------------------------------------------------------------------------------------------------------------------------------------------------------------------------------------------------------------------------------------------|
| Journal:                        | <i>BMJ Open</i>                                                                                                                                                                                                                                                                                                                                                                                                                                                                                                                                                                                                                                                                                                                                                                                                                                                                                                                                                       |
| Manuscript ID                   | bmjopen-2019-036138.R1                                                                                                                                                                                                                                                                                                                                                                                                                                                                                                                                                                                                                                                                                                                                                                                                                                                                                                                                                |
| Article Type:                   | Original research                                                                                                                                                                                                                                                                                                                                                                                                                                                                                                                                                                                                                                                                                                                                                                                                                                                                                                                                                     |
| Date Submitted by the Author:   | 13-Jul-2020                                                                                                                                                                                                                                                                                                                                                                                                                                                                                                                                                                                                                                                                                                                                                                                                                                                                                                                                                           |
| Complete List of Authors:       | Altoukhi, Renad; King Saud bin Abdulaziz University for Health Sciences, College of Pharmacy<br>Alshouimi, Reema; King Saud bin Abdulaziz University for Health Sciences, College of Pharmacy<br>Al Rammah, Shahad ; King Saud bin Abdulaziz University for Health Sciences, College of Pharmacy<br>Alzahrani, Mohammed; King Saud bin Abdulaziz University for Health Sciences, College of Pharmacy - Department of Pharmacy Practice<br>Almutairi, Abdulaali ; Saudi Food and Drug Authority<br>Alshehri, Abdulmajeed; King Saud bin Abdulaziz University for Health Sciences, College of Pharmacy - Department of Pharmacy Practice<br>Alfayez, Osamah; Qassim University, College of Pharmacy - Department of Pharmacy Practice<br>Al Yami, Majed; King Saud bin Abdulaziz University for Health Sciences, College of Pharmacy - Department of Pharmacy Practice<br>Almohammed, Omar; King Saud University, College of Pharmacy - Department of Clinical Pharmacy |
| <b>Primary Subject Heading</b>: | Cardiovascular medicine                                                                                                                                                                                                                                                                                                                                                                                                                                                                                                                                                                                                                                                                                                                                                                                                                                                                                                                                               |
| Secondary Subject Heading:      | Evidence based practice                                                                                                                                                                                                                                                                                                                                                                                                                                                                                                                                                                                                                                                                                                                                                                                                                                                                                                                                               |
| Keywords:                       | Anticoagulation < HAEMATOLOGY, Myocardial infarction < CARDIOLOGY, Coronary heart disease < CARDIOLOGY, Thromboembolism < CARDIOLOGY, Bleeding disorders & coagulopathies < HAEMATOLOGY                                                                                                                                                                                                                                                                                                                                                                                                                                                                                                                                                                                                                                                                                                                                                                               |
|                                 |                                                                                                                                                                                                                                                                                                                                                                                                                                                                                                                                                                                                                                                                                                                                                                                                                                                                                                                                                                       |

SCHOLARONE™  
Manuscripts



I, the Submitting Author has the right to grant and does grant on behalf of all authors of the Work (as defined in the below author licence), an exclusive licence and/or a non-exclusive licence for contributions from authors who are: i) UK Crown employees; ii) where BMJ has agreed a CC-BY licence shall apply, and/or iii) in accordance with the terms applicable for US Federal Government officers or employees acting as part of their official duties; on a worldwide, perpetual, irrevocable, royalty-free basis to BMJ Publishing Group Ltd ("BMJ") its licensees and where the relevant Journal is co-owned by BMJ to the co-owners of the Journal, to publish the Work in this journal and any other BMJ products and to exploit all rights, as set out in our [licence](#).

The Submitting Author accepts and understands that any supply made under these terms is made by BMJ to the Submitting Author unless you are acting as an employee on behalf of your employer or a postgraduate student of an affiliated institution which is paying any applicable article publishing charge ("APC") for Open Access articles. Where the Submitting Author wishes to make the Work available on an Open Access basis (and intends to pay the relevant APC), the terms of reuse of such Open Access shall be governed by a Creative Commons licence – details of these licences and which [Creative Commons](#) licence will apply to this Work are set out in our licence referred to above.

Other than as permitted in any relevant BMJ Author's Self Archiving Policies, I confirm this Work has not been accepted for publication elsewhere, is not being considered for publication elsewhere and does not duplicate material already published. I confirm all authors consent to publication of this Work and authorise the granting of this licence.

1  
2  
3  
4 **1 Title:**  
5

6 2 Safety and efficacy of dual vs. triple antithrombotic therapy (DAT vs. TAT) in patients with  
7 3 atrial fibrillation following a PCI: a systematic review and network meta-analysis  
8

9 **4 Authors:**  
10

11 5 Renad M Altoukhi <sup>1</sup>

12 6 Reema A Alshouimi <sup>1</sup>

13 7 Shahad M Al Rammah <sup>1</sup>

14 8 Mohammed Y Alzahrani <sup>1</sup>

15 9 Abdulaali R Almutairi <sup>2</sup>

16 10 Abdulmajeed M Alshehri <sup>1</sup>

17 11 Osamah M. Alfayez <sup>3</sup>

18 12 Majed S Al Yami <sup>1</sup>

19 13 Omar A Almohammed <sup>4</sup>

20 14 <sup>1</sup>Department of Pharmacy Practice, College of pharmacy, King Saud bin Abdulaziz University for  
21 15 Health Sciences, Riyadh, Saudi Arabia

22 16 <sup>2</sup>Saudi Food and Drug Authority, Riyadh, Saudi Arabia.

23 17 <sup>3</sup>Department of Pharmacy Practice, College of pharmacy, Qassim University, Qassim, Saudi Arabia

24 18 <sup>4</sup>Department of Clinical Pharmacy, College of Pharmacy, King Saud University, P.O. Box 2457, Riyadh  
25 19 11451, Saudi Arabia

26  
27  
28  
29  
30  
31  
32  
33  
34  
35 **20 Corresponding author contact information:**  
36

37 21 Omar A Almohammed, B.Pharm, PharmD, PhD

38 22 Assistant Professor

39 23 Department of Clinical Pharmacy

40 24 College of Pharmacy - King Saud University

41 25 Mobile: +966555104065

42 26 E-mail: oalmohammed@ksu.edu.sa  
43

44  
45 **27 Word count:**  
46

47 28 2288 words  
48  
49  
50  
51  
52  
53  
54  
55  
56  
57  
58  
59  
60

## 1 **Abstract**

### 2 **Objective**

3 Creating an appropriate antithrombotic therapy for patients with atrial fibrillation (AF) who  
4 have undergone percutaneous coronary intervention (PCI) remains a dilemma. Several clinical  
5 trials compared the use of a dual antithrombotic therapy (DAT) regimen with a direct oral  
6 anticoagulants (DOAC) including (apixaban, dabigatran, edoxaban, or rivaroxaban) and a  
7 P2Y<sub>12</sub> inhibitor versus a triple antithrombotic therapy (TAT) that includes a vitamin K  
8 antagonist (VKA) plus aspirin and a P2Y<sub>12</sub> inhibitor in AF patients who have undergone PCI.  
9 However, there are no head-to-head trials comparing the DAT regimens to each other. We  
10 aimed to compare the efficacy and safety of DAT regimens using a network meta-analysis  
11 (NMA) approach.

### 12 **Design**

13 A systematic review and network meta-analysis of randomized clinical trials

### 14 **Methods:**

15 We conducted a systematic literature review to identify relevant randomized clinical trials, and  
16 performed a Bayesian NMA for International Society on Thrombosis and Haemostasis (ISTH)  
17 major or clinically relevant non-major (CRNM) bleeding, all-cause mortality, stroke,  
18 myocardial infarction (MI), and stent thrombosis outcomes. We used NetMetaXL 1.6.1 and  
19 WinBUGS 1.4.3 for the NMA and estimated the probability of ranking the treatments based  
20 on the surface under the cumulative ranking curve.

### 21 **Results:**

22 The comparison between DAT regimens showed no significant difference in the safety or  
23 efficacy outcomes. Apixaban regimen was ranked first preferred therapy in-terms of ISTH  
24 major or CRNM bleeding and stroke, with a probability of 52% and 54%, respectively.  
25 Rivaroxaban regimen was the preferred therapy in-terms of MI and stent thrombosis, with a  
26 probability of 34% and 27%, respectively. Dabigatran regimen was ranked first in-terms of all-  
27 cause mortality, with a probability of 28%.

### 28 **Conclusion:**

29 The DAT regimens are as safe and effective as TAT regimens. However, ranking probabilities  
30 for the best option in the selected outcomes can be used to guide the selection among these  
31 agents based on different patients' conditions.

1  
2  
3 **1 Keywords:**  
4

5  
6 2 DAT, TAT, PCI, Anticoagulants, Atrial Fibrillation, Bleeding  
7  
8 3  
9

10 **4 Strengths and limitations of this study:**  
11

- 12  
13 5 • The utilized network meta-analysis technique facilitated the comparison of dual  
14 antithrombotic therapy regimens versus triple antithrombotic therapy regimen in patients  
15 6 with AF who have undergone PCI.  
16  
17 7  
18 8 • Only randomized clinical trials were included in this network meta-analysis  
19  
20 9 • All the included studies were of high quality with a low risk of bias  
21  
22 10 • The results were associated with wide confidence intervals, which might affect the  
23 precision of the findings.  
24  
25 11  
26  
27 12  
28  
29 13  
30  
31  
32  
33  
34  
35  
36  
37  
38  
39  
40  
41  
42  
43  
44  
45  
46  
47  
48  
49  
50  
51  
52  
53  
54  
55  
56  
57  
58  
59  
60



## 1 INTRODUCTION

2 Atrial fibrillation (AF) is a common comorbidity in patients with acute coronary  
3 syndrome (ACS) due to similar risk factors. The incidence rate of AF in ACS patients ranges  
4 from 5% to 23%.<sup>1-5</sup> Appropriate antithrombotic therapy for patients with AF who had ACS or  
5 have undergone percutaneous coronary intervention (PCI) is controversial. In patients with AF,  
6 oral anticoagulation is recommended for the prevention of cardioembolic stroke,<sup>6</sup> but its  
7 efficacy in preventing stent thrombosis for patients with PCI is not well established.

8 Dual-antiplatelet therapy (DAPT), with aspirin plus a P2Y<sub>12</sub> inhibitor, is recommended  
9 in patients with ACS for secondary prevention of ischemic events and stent thrombosis.<sup>7</sup> Triple  
10 therapy, including an oral anticoagulant on top of the DAPT, was recommended by previous  
11 guidelines and considered a standard of care for patients with AF who experienced ACS or  
12 undergone PCI.<sup>7 8</sup> However, the most recent AHA/ACC/HRS 2019 guidelines suggested the  
13 use of dual antithrombotic therapy (DAT: vitamin K antagonist (VKA) or a direct oral  
14 anticoagulant (DOAC) plus a P2Y<sub>12</sub> inhibitor) over the triple antithrombotic therapy (TAT:  
15 oral anticoagulant, aspirin and a P2Y<sub>12</sub> inhibitor),<sup>6</sup> due to the increased risk of bleeding with  
16 the triple therapy that was reported in multiple studies.<sup>9-14</sup>

17 In an attempt to clarify this controversy, six randomized control trials (WOEST, ISAR-  
18 TRIPLE, PIONEER-AF-PCI, RE-DUAL-PCI, AUGUSTUS, and ENTRUST-AF-PCI) were  
19 conducted to assess the efficacy and safety of the TAT compared to the DAT for patients with  
20 AF receiving oral anticoagulation after experiencing ACS or undergoing PCI.<sup>9-14</sup> Although  
21 these trials reported a higher incidence of major bleeding in patients receiving the TAT  
22 compared to the DAT without significant differences in the risk of ischemic events, it is  
23 noteworthy to recognize that these trials were underpowered to detect ischemic events.

24 Several observational studies found a higher risk of bleeding with the triple therapy that  
25 involved vitamin K antagonist, aspirin and a P2Y<sub>12</sub> inhibitor.<sup>15-17</sup> The objective of this network  
26 meta-analysis is to assess the safety and efficacy of a DAT regimen with a DOAC versus a  
27 TAT regimen with a VKA in patients with AF who experienced ACS or undergone PCI.

## 1 METHODS

2 A systemic literature search was conducted on MEDLINE and Embase through October,  
3 2019 to identify randomized clinical trials that evaluated the use of DOACs in patients with  
4 AF who experienced ACS or undergone PCI. The search terms included percutaneous coronary  
5 intervention, PCI, atrial fibrillation, acute coronary syndrome, ACS, stent, anticoagulants,  
6 rivaroxaban, edoxaban, apixaban, dabigatran, DOACs, vitamin K antagonist, VKA, warfarin,  
7 aspirin, clopidogrel, triple therapy, double therapy, dual antithrombotic therapy, DAT, triple  
8 antithrombotic therapy, and TAT. We also searched for other systematic reviews and meta-  
9 analyses and reviewed their references to identify any relevant studies. The search was limited  
10 to studies that were published in English within the last ten years.

11 For each study, episodes of major or clinically relevant non-major (CRNM) bleeding  
12 events based on the International Society on Thrombosis and Haemostasis (ISTH) definition,<sup>18</sup>  
13 all-cause mortality, stroke, myocardial infarction (MI), stent thrombosis were extracted  
14 (Supplementary Table 1). Data were extracted from the published studies and assessed for  
15 eligibility by two independent investigators (RMA and RAM) and verified by a third  
16 investigator (OAA). The risk of bias assessment was conducted for each study using the  
17 Cochrane Collaboration risk of bias assessment tool.<sup>19</sup> A Bayesian network meta-analysis  
18 (NMA), a statistical method that can incorporate both direct and indirect comparisons including  
19 treatment arms that were not previously compared in head to head trials from a clinical trial,  
20 was conducted for the pre-specified outcomes using NetMetaXL 1.6.1 (Canadian Agency for  
21 Drugs and Technologies in Health, Ottawa, Canada)<sup>20</sup> and WinBUGS 1.4.3 (MRC Biostatistics  
22 Unit, Cambridge, United Kingdom). We utilized the random effect binomial model with vague  
23 priors and employing Markov chain Monte Carlo simulation for 60000 iterations after  
24 discarding 30000 iteration as burn-in simulations initially. Estimates of the outcomes were  
25 presented in odds ratio (OR) and 95% credible intervals (95% CrI). Also, we estimated the  
26 probability of ranking the treatments based on the surface under the cumulative ranking  
27 curve.<sup>21</sup> We reported this NMA according to the preferred reporting items for systematic  
28 reviews and meta-analyses for network meta-analyses (PRISMA-NMA).<sup>22</sup>

## 1 Patient and public involvement

2 Patients and the public were not involved in the design or conduct of the study.

## 3 RESULTS

4 A total of 662 articles were identified in the systematic search. Four studies, PIONEER-  
5 AF PCI, RE-DUAL PCI, AUGUSTUS, and ENTRUST-AF PCI, met the inclusion criteria, and  
6 were included in the current NMA.<sup>11-14</sup> The flowchart in Figure 1 illustrates the process of  
7 including and excluding articles for this NMA. The risk of bias assessment of the included  
8 trials showed low risk of bias (Supplementary Table 2).

### 9 Summary of the included trials

10 The trials that were included demonstrated favorable results for the pre-specified  
11 outcomes towards DOACs when mainly used in a DAT regimen in combination with a P2Y<sub>12</sub>  
12 inhibitor only.<sup>11-14</sup> The PIONEER AF-PCI trial was the first to be conducted to compare the  
13 safety and efficacy of using DOACs agent in a DAT regimen to TAT regimen. A DAT regimen  
14 including low-dose rivaroxaban (15 mg once daily) in combination with a P2Y<sub>12</sub> inhibitor  
15 (group 1) was compared to a TAT regimen that included P2Y<sub>12</sub> inhibitor and aspirin in  
16 combination with either a very low dose rivaroxaban (2.5 mg twice daily; group 2) or VKA  
17 (group 3). The study found the bleeding rates were significantly reduced for groups 1 and 2  
18 compared to group 3 (16.8%, 18.0%, and 26.7%, respectively; hazard ratio [HR] for group 1  
19 vs. 3 =0.59; 95%CI 0.47–0.76; HR for group 2 vs. 3 =0.63; 95%CI 0.50–0.80). However, the  
20 rivaroxaban dose that was used in the trial is lower than the recommended daily dose for stroke  
21 prevention in atrial fibrillation (20 mg), and the very low dose was not included in the NMA.<sup>11</sup>

22 The RE-DUAL PCI study was conducted to compare the safety and efficacy of using  
23 dabigatran (110 or 150 mg twice daily) in a DAT regimen with a P2Y<sub>12</sub> inhibitor to a TAT  
24 regimen that included P2Y<sub>12</sub> inhibitor and aspirin in combination with a VKA. The findings of  
25 the study demonstrated a significantly lower risk of bleeding for the DAT regimen that included  
26 dabigatran to the TAT regimen (HR =0.52; 95%CI 0.42–0.63; P<0.001 for superiority).<sup>12</sup>

1  
2  
3 1 However, it is to be noted that both studies, the PIONEER AF-PCI and RE-DUAL PCI, were  
4  
5 2 not powered to detect any significant disparities in efficacy between the DOACs and VKA.  
6

7  
8 3 The AUGUSTUS trial compared the use of apixaban to a VKA along with clopidogrel  
9  
10 4 and aspirin to a placebo using a 2x2 factorial design. The study concluded that a DAT regimen  
11  
12 5 with apixaban and clopidogrel only was both non-inferior and superior to a TAT regimen in-  
13  
14 6 terms of reducing the risk of major or CRNM bleeding (HR =0.69; 95%CI 0.58–0.81;  $p<0.001$   
15  
16 7 for both non-inferiority and superiority), while there was no difference in the ischemic event  
17  
18 8 outcomes.<sup>13</sup>

19  
20  
21 9 The most recent, ENTRUST-AF PCI trial was designed to assess a DAT regimen, that  
22  
23 10 included edoxaban plus a P2Y<sub>12</sub> inhibitor, to a TAT regimen, that included a VKA plus P2Y<sub>12</sub>  
24  
25 11 inhibitor and aspirin. Similar to the previous trials, they found a lower rate of bleeding in the  
26  
27 12 DAT regimen in comparison to the TAT regimen (HR =0.83, 95%CI 0.65–1.05;  $p=0.0010$  for  
28  
29 13 non-inferiority). However, unlike other DOACs, the trial found the edoxaban regimen to be  
30  
31 14 non-inferior, but not superior to the TAT regimen.<sup>14</sup>

## 32 33 34 35 15 **Network meta-analysis**

### 36 37 38 16 **Demographic characteristics**

39  
40  
41 17 A total of 7,890 patients were included in the NMA. The mean age for the included  
42  
43 18 patients ranged between 68 and 71 years, and about 22 to 30% of participants were females.  
44  
45 19 The detailed patients' demographics and outcomes from the included studies were presented  
46  
47 20 in Table 1.

### 48 49 50 21 **ISTH major or CRNM bleeding**

51  
52  
53 22 There were no significant differences between all DOACs when used in DAT regimens  
54  
55 23 as well as when compared to TAT regimen, using VKA. Among all, DAT regimen containing  
56  
57 24 apixaban was the preferred one, with a probability of 52%, followed by regimens containing  
58  
59 25 dabigatran or rivaroxaban, with a probability of 18% and 17.9%, respectively (Figure 2).

1  
2  
3 1 All-cause mortality  
4

5 2 The NMA showed no differences between all DAT regimens containing DOACs as well  
6  
7  
8 3 as between DAT and TAT regimens in regard to all-cause mortality. However, the ranking of  
9  
10 4 DAT regimens showed that dabigatran regimen was the preferred agent, followed by apixaban  
11  
12  
13 5 regimen, and rivaroxaban regimen with a probability of 28%, 21.5%, and 20.8%, respectively  
14  
15 6 (Figure 3 [A], Supplementary Figure 1).  
16  
17

18  
19 7 Stroke  
20

21 8 Similar to all-cause mortality, the results of the NMA showed no significant difference  
22  
23 9 between the DOACs when used in DAT regimen, and when compared to the TAT regimen,  
24  
25  
26 10 with VKA. Apixaban DAT regimen was ranked first, followed by regimens of edoxaban and  
27  
28 11 rivaroxaban with a probability of 54%, 19.5%, and 12.4%, respectively (Figure 3 [B],  
29  
30 12 Supplementary Figure 2).  
31  
32

33  
34 13 Myocardial infarction (MI)  
35

36 14 There were no significant differences between all DOACs in the DAT regimens  
37  
38  
39 15 compared to each other or to the TAT regimen, with VKA. Rivaroxaban DAT regimen was the  
40  
41 16 preferred regimen, followed by apixaban regimen and edoxaban regimen, with a probability of  
42  
43 17 34%, 22%, and 18%, respectively (Figure 4 [A], Supplementary Figure 3).  
44  
45

46  
47 18 Stent thrombosis  
48

49 19 The odds of stent thrombosis were similar across all DAT regimens with DOACs and  
50  
51 20 TAT regimen, with rivaroxaban DAT regimen being the preferred regimen with a probability  
52  
53  
54 21 of 27% and followed by edoxaban regimen with a probability of 23% (Figure 4 [B],  
55  
56 22 Supplementary figure 4).  
57  
58  
59  
60

**Table 1:** Patients' demographics and outcomes from the included randomized controlled trials

| Name of the Study               | PIONEER AF-PCI* <sup>11</sup>   |                                          | RE-DUAL PCI <sup>12</sup>       |                                          | AUGUSTUS* <sup>13</sup>         |                                          | ENTRUST-AF-PCI <sup>14</sup>    |                                          |
|---------------------------------|---------------------------------|------------------------------------------|---------------------------------|------------------------------------------|---------------------------------|------------------------------------------|---------------------------------|------------------------------------------|
| Relevant Groups in the Study    | DAT<br>Riva+P2Y <sub>12</sub> i | TAT<br>VKA+ P2Y <sub>12</sub> i<br>+ ASA | DAT<br>Dabi+P2Y <sub>12</sub> i | TAT<br>VKA+ P2Y <sub>12</sub> i<br>+ ASA | DAT<br>Apix+P2Y <sub>12</sub> i | TAT<br>VKA+ P2Y <sub>12</sub> i<br>+ ASA | DAT<br>Edox+P2Y <sub>12</sub> i | TAT<br>VKA+ P2Y <sub>12</sub> i<br>+ ASA |
| <i>n</i>                        | 696                             | 697                                      | 1744                            | 981                                      | 1143                            | 1123                                     | 751                             | 755                                      |
| <b>Baseline Characteristics</b> |                                 |                                          |                                 |                                          |                                 |                                          |                                 |                                          |
| Age (years, SD or IQR)          | 70.4 (9.1)                      | 69.9 (8.7)                               | 70.2 (8.4)                      | 71.7 (8.9)                               | 70.6 (64 - 77)                  | 70.8 (64 - 77)                           | 69 (63 – 77)                    | 70 (64 – 77)                             |
| Female (%)                      | 25.5%                           | 26.6%                                    | 24.3%                           | 23.5%                                    | 27.8%                           | 30.2%                                    | 26.0%                           | 25.4%                                    |
| <i>Risk Factors:</i>            |                                 |                                          |                                 |                                          |                                 |                                          |                                 |                                          |
| Diabetes (%)                    | 28.8%                           | 31.3%                                    | 35.7%                           | 37.9%                                    | 36.2%                           | 36.5%                                    | 34.5%                           | 34.2%                                    |
| Hypertension (%)                | 73.3%                           | 75.4%                                    | NR                              | NR                                       | 88.5%                           | 88.0%                                    | 90.0%                           | 91.0%                                    |
| Dyslipidemia (%)                | 42.6%                           | 44.8%                                    | NR                              | NR                                       | NR                              | NR                                       | 66.2%                           | 64.1%                                    |
| History of MI (%)               | 19.8%                           | 22.2%                                    | 24.7%                           | 27.3%                                    | NR                              | NR                                       | 25.0%                           | 23.4%                                    |
| <i>Type of index event (%)</i>  |                                 |                                          |                                 |                                          |                                 |                                          |                                 |                                          |
| ACS                             | 51.5%                           | 52.2%                                    | 51.6%                           | 48.4%                                    | 61.7%                           | 60.7%                                    | 51.7%                           | 51.5%                                    |
| Non-ACS                         | 48.5%                           | 47.8%                                    | 48.4%                           | 51.6%                                    | 38.3%                           | 39.3%                                    | 48.3%                           | 48.5%                                    |
| <b>Outcomes</b>                 |                                 |                                          |                                 |                                          |                                 |                                          |                                 |                                          |
| Major or CRNM bleeding (ISTH)   | 16.8%                           | 25.5%                                    | 17%                             | 27%                                      | 7.3%                            | 18.7%                                    | 17%                             | 20%                                      |
| Death from any cause            | 2.3%                            | 1.9%                                     | 4.9%                            | 4.9%                                     | 3.4%                            | 2.9%                                     | 6.1%                            | 4.9%                                     |
| MI                              | 3.0%                            | 3.5%                                     | 4.0%                            | 3.0%                                     | 3.3%                            | 2.9%                                     | 3.9%                            | 3.0%                                     |
| Stroke                          | 1.3%                            | 1.2%                                     | 1.5%                            | 1.3%                                     | 0.4%                            | 1.0%                                     | 1.3%                            | 1.6%                                     |
| Stent thrombosis                | 0.8%                            | 0.7%                                     | 1.3%                            | 0.8%                                     | 1.8%                            | 1.0%                                     | 1.7%                            | 1.3%                                     |

\*The patients' baseline characteristics for these studies are based on the overall population in the studies

DAT: Dual antithrombotic therapy, TAT: Triple antithrombotic therapy, Riva: Rivaroxaban, Dabi: Dabigatran, Apex: Apixaban, Edox: Edoxaban, VKA: Vitamin K antagonist, P2Y<sub>12</sub>i: P2Y<sub>12</sub> inhibitors, ASA: Aspirin, MI: Myocardial infarction, CRNM: Clinically relevant non-major, ISTH: International Society on Thrombosis and Haemostasis, NR: Not reported

## 1 DISCUSSION

2 For patients with atrial fibrillation who experienced ACS or undergone PCI, the selection  
3 of a regimen that is both effective in preventing stroke and stent thrombosis while minimizing  
4 the risk of bleeding remains a challenge for prescribers. The main focus of this NMA was to  
5 estimate the efficacy and safety of different DOACs in DAT regimens compared to each other  
6 and to VKA in a TAT regimen for patients with AF who undergone PCI, and to rank the  
7 DOACs in terms of difference in the efficacy and safety outcomes. We looked at five main end  
8 points, which were ISTH major or CRNM bleeding, all-cause mortality, stroke, MI, and stent  
9 thrombosis.

10 Our results showed no significant difference between a DAT regimen with a DOAC  
11 compared to a TAT regimen with a VKA for all the specified outcomes. This demonstrates that  
12 the DAT regimen with DOACs is just as safe and effective as the TAT regimen with a VKA.  
13 However, apixaban regimen was the preferred option in reducing the risk of major or CRNM  
14 bleeding and stroke, dabigatran regimen was ranked as first option in the reduction of all-cause  
15 mortality, and rivaroxaban regimen was the preferred in-term of reducing the risk of MI and  
16 stent thrombosis. Based on this ranking, VKA was ranked the lowest in comparison to all  
17 DOACs' DAT regimens in terms of bleeding, all-cause mortality, and MI. A previous NMA  
18 by Lopes et al. presented similar results, but in their NMA, there was a significant difference  
19 between the DAT and the TAT regimens with a more favorable outcome in terms of safety for  
20 the regimen that includes a DOAC and a P2Y<sub>12</sub> inhibitor.<sup>23</sup>

21 The 2016 European Society of Cardiology (ESC) guidelines for the management of AF  
22 recommended to initiate the patients' management on the triple therapy that includes an oral  
23 anticoagulant (OAC) with aspirin and clopidogrel in the first month of treatment after PCI, or  
24 to an extended period of 6 months in case of lower risk of bleeding; then, to continue with a  
25 dual therapy (OAC plus aspirin or clopidogrel) for 6 to 12 months, and lifetime therapy on an  
26 OAC.<sup>8</sup> Only aspirin and clopidogrel were recommended as antiplatelet therapy as opposed to  
27 third generation P2Y<sub>12</sub> inhibitors due to the increased risk of bleeding and lack of evidence. If

1  
2  
3 1 a DOAC is chosen for anticoagulation, then the lowest effective dose for stroke prevention  
4  
5 2 should be used. However, a regimen of low-dose rivaroxaban plus clopidogrel and aspirin is  
6  
7  
8 3 not recommended for stroke prevention in atrial fibrillation.<sup>8</sup> In the recent AHA/ACC/HRS  
9  
10 4 2019 guidelines for the management of AF in patients who had undergone PCI, the guidelines  
11  
12 5 favored the DAT over the TAT; for patients with an increased risk of stroke based on their  
13  
14 6 CHA<sub>2</sub>DS<sub>2</sub>-VASc who should be initiated on triple therapy (OAC plus P2Y<sub>12</sub> inhibitor plus  
15  
16 7 aspirin), it is recommended to transition them to double therapy at the 4<sup>th</sup> to 6<sup>th</sup> week of  
17  
18 8 treatment.<sup>6</sup> However, no recommendations were made in such population regarding the use of  
19  
20 9 apixaban and edoxaban due to the lack of data on these agents at that time.  
21  
22  
23

24 10 The results of this NMA align with the findings of previous studies that demonstrates the  
25  
26 11 sufficiency of the DAT regimen for the prevention of stroke in patients with AF who  
27  
28 12 experienced ACS or undergone PCI, with the added benefit of having a reduced risk of bleeding  
29  
30 13 in those patients.<sup>12 9 11 13 10 14</sup> There are some limitations to this NMA. The prominent variation  
31  
32 14 in the design, the length of follow-up period, and sample sizes between the included trials could  
33  
34 15 have possibly contributed to the wide confidence interval and the lack of significance in our  
35  
36 16 analysis. Therefore, the findings should be used with caution until a large direct comparison  
37  
38 17 studies among DOACs are conducted or findings from retrospective studies become available  
39  
40 18 to support this evidence. Perhaps future studies could look more into patient specific outcomes  
41  
42 19 that could be based on differences in terms of sex, age group, presence of other comorbidities,  
43  
44 20 genetic variations, and other P2Y<sub>12</sub> inhibitors.  
45  
46  
47  
48

## 21 **Conclusion**

22 The DAT regimens with DOACs are as safe and effective as the TAT regimen with VKA.  
23 Moreover, DOACs in DAT regimens had higher ranking probabilities as a best option in the  
24 selected outcomes over VKA in a TAT regimen. These ranking probabilities can be used to  
25 guide the selection among different DOACs agents based on patients' conditions, until  
26 evidence from large and direct comparison studies become available.



## 1 References

1. Lopes RD, Pieper KS, Horton JR et al. Short-and long-term outcomes following atrial fibrillation in patients with acute coronary syndromes with or without ST-segment elevation. *Heart* 2008;94(7):867-73 doi:10.1136/hrt.2007.134486
2. Mehta RH, Dabbous OH, Granger CB et al. Comparison of outcomes of patients with acute coronary syndromes with and without atrial fibrillation. *Am J Cardiol* 2003;92(9):1031-6 doi:10.1016/j.amjcard.2003.06.001
3. Saczynski JS, McManus D, Zhou Z et al. Trends in atrial fibrillation complicating acute myocardial infarction. *Am J Cardiol* 2009;104(2):169-74 doi:10.1016/j.amjcard.2009.03.011
4. Schmitt J, Duray G, Gersh BJ et al. Atrial fibrillation in acute myocardial infarction: a systematic review of the incidence, clinical features and prognostic implications. *Eur Heart J* 2008;30(9):1038-45 doi:10.1093/eurheartj/ehn579
5. Tsang TS, Miyasaka Y, Barnes ME et al. Epidemiological profile of atrial fibrillation: a contemporary perspective. *Prog Cardiovasc Dis* 2005;1(48):1-8 doi:10.1016/j.pcad.2005.06.001
6. January CT, Wann LS, Calkins H et al. 2019 AHA/ACC/HRS Focused update of the 2014 AHA/ACC/HRS guideline for the management of patients with atrial fibrillation: a report of the American College of Cardiology/American Heart Association task force on clinical practice guidelines and the heart rhythm society. *Heart Rhythm* 2019;10.1016/j.hrthm.2019.01.024
7. Amsterdam EA, Wenger NK, Brindis RG et al. 2014 AHA/ACC guideline for the management of patients with non-ST-elevation acute coronary syndromes. *Circulation* 2014;130(25):e344-e426 doi:10.1016/j.jacc.2014.09.017
8. Kirchhof P, Benussi S, Kotecha D et al. 2016 ESC Guidelines for the management of atrial fibrillation developed in collaboration with EACTS. *Kardiol Pol* 2016;74(12):2893-962 doi:10.1161/CIR.000000000000134
9. Dewilde WJ, Oirbans T, Verheugt FW et al. Use of clopidogrel with or without aspirin in patients taking oral anticoagulant therapy and undergoing percutaneous coronary intervention: an open-label, randomised, controlled trial. *Lancet* 2013;381(9872):1107-15 doi:10.1016/s0140-6736(12)62177-1
10. Fiedler KA, Maeng M, Mehilli J et al. Duration of triple therapy in patients requiring oral anticoagulation after drug-eluting stent implantation: the ISAR-TRIPLE trial. *J Am Coll Cardiol* 2015;65(16):1619-29 doi:10.1016/j.jacc.2015.02.050
11. Gibson CM, Mehran R, Bode C et al. Prevention of bleeding in patients with atrial fibrillation undergoing PCI. *N Engl J Med* 2016;375(25):2423-34 doi:10.1056/NEJMoa1611594
12. Cannon CP, Bhatt DL, Oldgren J et al. Dual antithrombotic therapy with dabigatran after PCI in atrial fibrillation. *N Engl J Med* 2017;377(16):1513-24 doi:10.1056/NEJMoa1708454
13. Lopes RD, Heizer G, Aronson R et al. Antithrombotic therapy after acute coronary syndrome or PCI in atrial fibrillation. *N Engl J Med* 2019;18(380):1509-24 doi:10.1056/NEJMoa1817083

14. Vranckx P, Valgimigli M, Eckardt L et al. Edoxaban-based versus vitamin K antagonist-based antithrombotic regimen after successful coronary stenting in patients with atrial fibrillation (ENTRUST-AF PCI): a randomised, open-label, phase 3b trial. *Lancet* 2019;394(10206):1335-43 doi:10.1016/s0140-6736(19)31872-0
15. Hansen ML, Sorensen R, Clausen MT et al. Risk of bleeding with single, dual, or triple therapy with warfarin, aspirin, and clopidogrel in patients with atrial fibrillation. *Arch Intern Med* 2010;170(16):1433-1444 doi:10.1001/archinternmed.2010.271
16. Lopes RD, Rao M, Simon DN et al. Triple vs dual antithrombotic therapy in patients with atrial fibrillation and coronary artery disease. *Am J Med* 2016;129(6):592-9 doi:10.1016/j.amjmed.2015.12.026
17. Sorensen R, Hansen ML, Abildstrom SZ et al. Risk of bleeding in patients with acute myocardial infarction treated with different combinations of aspirin, clopidogrel, and vitamin K antagonists in Denmark: a retrospective analysis of nationwide registry data. *Lancet* 2009;374(9706):1967-74 doi:10.1016/S0140-6736(09)61751-7
18. Mehran R, Rao SV, Bhatt DL et al. Standardized bleeding definitions for cardiovascular clinical trials: a consensus report from the Bleeding Academic Research Consortium. *Circulation* 2011;123(23):2736-47 doi:10.1161/circulationaha.110.009449
19. Higgins JPT, Altman DG, Gøtzsche PC et al. The Cochrane Collaboration's tool for assessing risk of bias in randomised trials. *BMJ* 2011;343:10.1136/bmj.d5928
20. Brown S, Hutton B, Clifford T et al. A Microsoft-Excel-based tool for running and critically appraising network meta-analyses--an overview and application of NetMetaXL. *Syst Rev* 2014;3:10.1186/2046-4053-3-110
21. Salanti G, Ades AE, Ioannidis JP Graphical methods and numerical summaries for presenting results from multiple-treatment meta-analysis: an overview and tutorial. *J Clin Epidemiol* 2011;64(2):163-71 doi:10.1016/j.jclinepi.2010.03.016
22. Hutton B, Salanti G, Caldwell DM et al. The PRISMA extension statement for reporting of systematic reviews incorporating network meta-analyses of health care interventions: checklist and explanations. *Ann Intern Med* 2015;162(11):777-84 doi:10.7326/m14-2385
23. Lopes RD, Hong H, Harskamp RE et al. Safety and efficacy of antithrombotic strategies in patients with atrial fibrillation undergoing percutaneous coronary intervention: a network meta-analysis of randomized controlled trials. *JAMA Cardiol* 2019;4(8):747-55 doi:10.1001/jamacardio.2019.1880

1  
2  
3  
4  
5  
6  
7  
8  
9  
10  
11  
12  
13  
14  
15  
16  
17  
18  
19  
20  
21  
22  
23  
24  
25  
26  
27  
28  
29  
30  
31  
32  
33  
34  
35  
36  
37  
38  
39  
40  
41  
42  
43  
44  
45  
46  
47  
48  
49  
50  
51  
52  
53  
54  
55  
56  
57  
58  
59  
60

## 1 Footnotes:

- 2 • **Contributors** MSA, MYA, and ARA designed the study, conducted the analysis,  
3 produced the tables and figures, and participated in writing the manuscript. SMA and  
4 AMA conducted the literature review, summarized the included trials, and prepared the  
5 resulting figure. RMA and RAA extracted the data and contributed to writing the  
6 manuscript. OAA and OMA reviewed the extracted data for the analysis and the tables for  
7 the results and contributed to writing the manuscript. All authors read and approved the  
8 final manuscript.
- 9 • **Funding** This work was supported by the Researcher Supporting Project number (RSP-  
10 2020/77), King Saud University, Riyadh, Saudi Arabia.
- 11 • **Competing interests** None declared
- 12 • **Patient and public involvement** Patients and/or the public were not involved in the  
13 design, or conduct, or reporting or dissemination plans of this research.
- 14 • **Patient consent for publication** Not required.
- 15 • **Provenance and peer review** Not commissioned; externally peer reviewed.
- 16 • **Data availability statement** All data relevant to the study are included in the article or  
17 uploaded as supplementary information.
- 18 • **Acknowledgment:** The authors would like to extend their appreciation to King Saud  
19 University for funding this work through the Researcher Supporting Project (RSP-  
20 2020/77), King Saud University, Riyadh, Saudi Arabia.
-

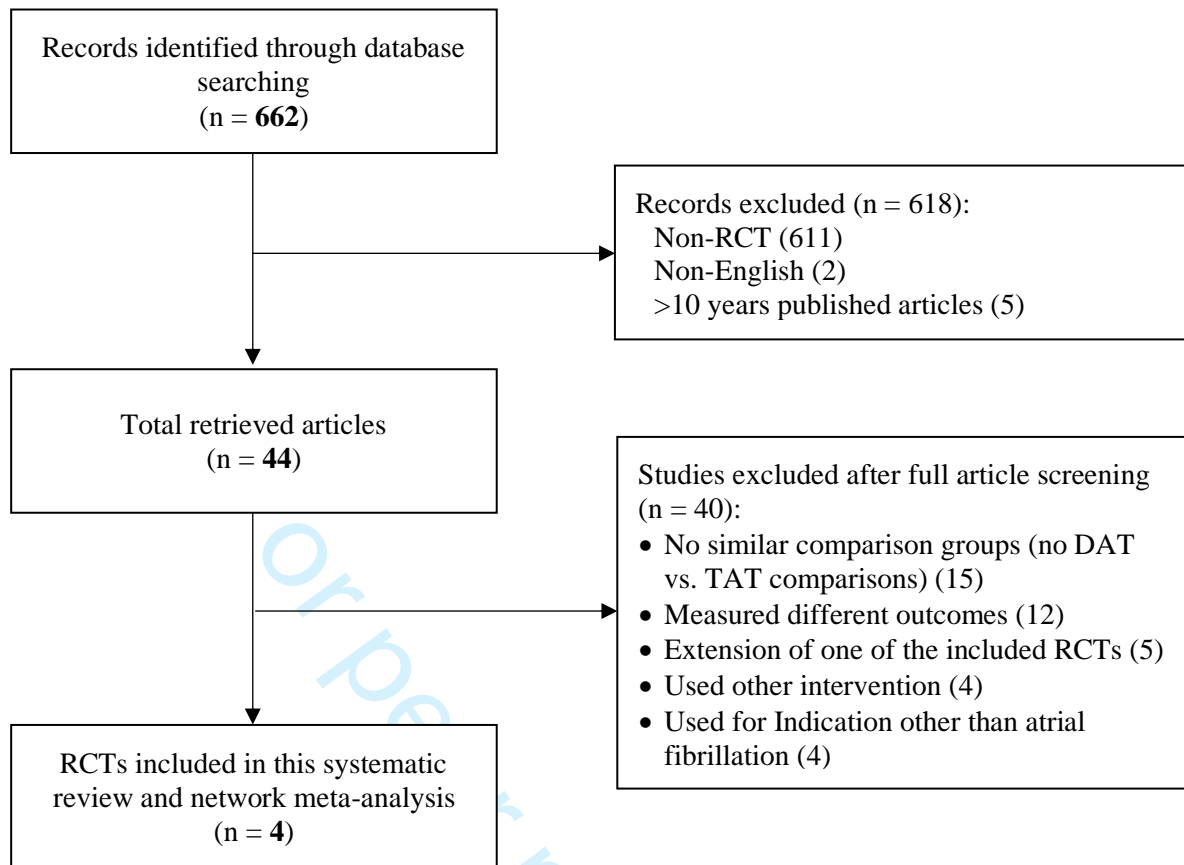

**Figure 1:** Flow diagram for studies included in the network meta-analysis

|                                         |                                                            |                                                 |                                         |                                              |
|-----------------------------------------|------------------------------------------------------------|-------------------------------------------------|-----------------------------------------|----------------------------------------------|
| <b>Apixaban<br/>+ P2Y<sub>12</sub>i</b> |                                                            |                                                 |                                         |                                              |
| 0.59<br>(0.02 – 20.88)                  | <b>Dabigatran<br/>(110/150 mg)<br/>+ P2Y<sub>12</sub>i</b> |                                                 |                                         |                                              |
| 0.58<br>(0.02 – 20.55)                  | 0.98<br>(0.03 – 34.48)                                     | <b>Rivaroxaban (LD)<br/>+ P2Y<sub>12</sub>i</b> |                                         |                                              |
| 0.42<br>(0.01 – 14.90)                  | 0.71<br>(0.02 – 25.50)                                     | 0.73<br>(0.02 – 25.58)                          | <b>Edoxaban<br/>+ P2Y<sub>12</sub>i</b> |                                              |
| 0.34<br>(0.03 – 4.34)                   | 0.58<br>(0.05 – 7.13)                                      | 0.59<br>(0.05 – 7.46)                           | 0.81<br>(0.07 – 10.28)                  | <b>VKA<br/>+ P2Y<sub>12</sub>i + Aspirin</b> |

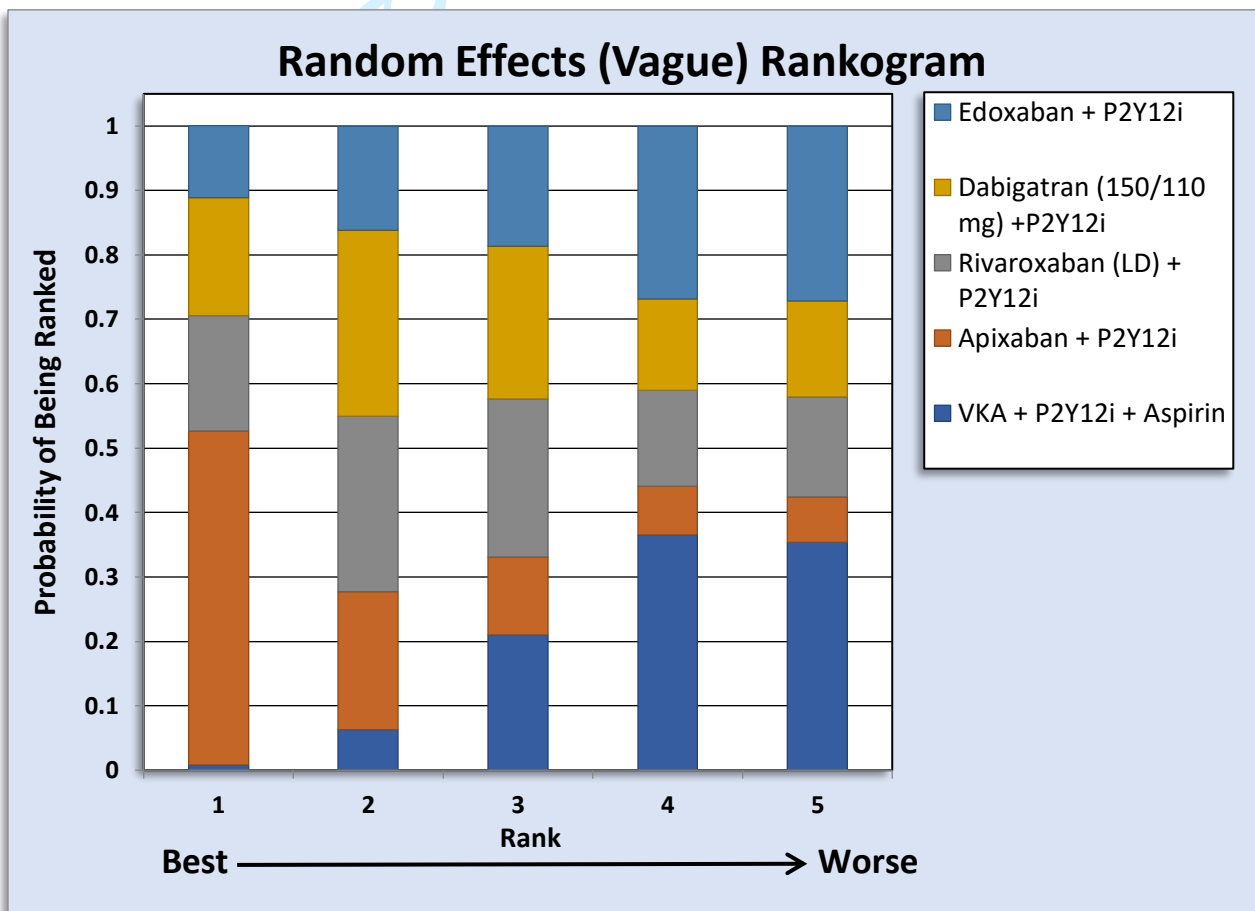

**Figure 2:** The network meta-analysis and the rankogram results for the International Society on Thrombosis and Haemostasis (ISTH) major or clinically relevant non-major (CRNM) bleeding.

Estimates are presented in odds ratio (OR) and 95% credible intervals (95% CrI). VKA: Vitamin K antagonist, P2Y<sub>12</sub>i: P2Y<sub>12</sub> inhibitor, LD: Low dose

|                                              |                                                            |                                         |                                                 |                                         |
|----------------------------------------------|------------------------------------------------------------|-----------------------------------------|-------------------------------------------------|-----------------------------------------|
| <b>VKA<br/>+ P2Y<sub>12</sub>i + Aspirin</b> |                                                            |                                         |                                                 |                                         |
| 1.00<br>(0.08 – 12.33)                       | <b>Dabigatran<br/>(110/150 mg)<br/>+ P2Y<sub>12</sub>i</b> |                                         |                                                 |                                         |
| 0.87<br>(0.07 – 11.19)                       | 0.87<br>(0.02 – 31.42)                                     | <b>Apixaban<br/>+ P2Y<sub>12</sub>i</b> |                                                 |                                         |
| 0.80<br>(0.06 – 11.00)                       | 0.80<br>(0.02 – 30.36)                                     | 0.93<br>(0.03 – 35.56)                  | <b>Rivaroxaban (LD)<br/>+ P2Y<sub>12</sub>i</b> |                                         |
| 0.79<br>(0.06 – 10.21)                       | 0.79<br>(0.02 – 29.03)                                     | 0.91<br>(0.02 – 33.73)                  | 0.99<br>(0.03 – 37.82)                          | <b>Edoxaban<br/>+ P2Y<sub>12</sub>i</b> |

(A) All-cause mortality

|                                         |                                         |                                              |                                                 |                                                            |
|-----------------------------------------|-----------------------------------------|----------------------------------------------|-------------------------------------------------|------------------------------------------------------------|
| <b>Apixaban<br/>+ P2Y<sub>12</sub>i</b> |                                         |                                              |                                                 |                                                            |
| 0.48<br>(0.01 – 19.86)                  | <b>Edoxaban<br/>+ P2Y<sub>12</sub>i</b> |                                              |                                                 |                                                            |
| 0.40<br>(0.03 – 5.70)                   | 0.83<br>(0.06 – 11.41)                  | <b>VKA<br/>+ P2Y<sub>12</sub>i + Aspirin</b> |                                                 |                                                            |
| 0.34<br>(0.01 – 14.68)                  | 0.71<br>(0.02 – 30.36)                  | 0.86<br>(0.06 – 12.35)                       | <b>Rivaroxaban (LD)<br/>+ P2Y<sub>12</sub>i</b> |                                                            |
| 0.34<br>(0.01 – 13.86)                  | 0.72<br>(0.02 – 28.15)                  | 0.88<br>(0.07 – 11.33)                       | 1.02<br>(0.02 – 40.06)                          | <b>Dabigatran<br/>(110/150 mg)<br/>+ P2Y<sub>12</sub>i</b> |

(B) Stroke

**Figure 3:** The network meta-analysis results for (A) all-cause mortality, and (B) stroke.

Estimates are presented in odds ratio (OR) and 95% credible intervals (95% CrI). VKA: Vitamin K antagonist, P2Y<sub>12</sub>i: P2Y<sub>12</sub> inhibitor, LD: Low dose.

|                                              |                                                 |                                         |                                                            |                                         |
|----------------------------------------------|-------------------------------------------------|-----------------------------------------|------------------------------------------------------------|-----------------------------------------|
| <b>VKA<br/>+ P2Y<sub>12</sub>i + Aspirin</b> |                                                 |                                         |                                                            |                                         |
| 0.77<br>(0.05 – 12.50)                       | <b>Rivaroxaban (LD)<br/>+ P2Y<sub>12</sub>i</b> |                                         |                                                            |                                         |
| 0.73<br>(0.05 – 10.81)                       | 0.95<br>(0.02 – 48.03)                          | <b>Edoxaban<br/>+ P2Y<sub>12</sub>i</b> |                                                            |                                         |
| 0.62<br>(0.05 – 8.52)                        | 0.81<br>(0.02 – 36.90)                          | 0.85<br>(0.02 – 36.67)                  | <b>Dabigatran<br/>(110/150 mg)<br/>+ P2Y<sub>12</sub>i</b> |                                         |
| 0.56<br>(0.04 – 7.52)                        | 0.72<br>(0.02 – 32.96)                          | 0.76<br>(0.02 – 32.03)                  | 0.90<br>(0.02 – 35.85)                                     | <b>Apixaban<br/>+ P2Y<sub>12</sub>i</b> |

## A) Myocardial infarction

|                                                 |                                              |                                         |                                         |                                                            |
|-------------------------------------------------|----------------------------------------------|-----------------------------------------|-----------------------------------------|------------------------------------------------------------|
| <b>Rivaroxaban (LD)<br/>+ P2Y<sub>12</sub>i</b> |                                              |                                         |                                         |                                                            |
| 0.90<br>(0.07 – 11.95)                          | <b>VKA<br/>+ P2Y<sub>12</sub>i + Aspirin</b> |                                         |                                         |                                                            |
| 0.80<br>(0.02 – 29.72)                          | 0.89<br>(0.07 – 11.55)                       | <b>Apixaban<br/>+ P2Y<sub>12</sub>i</b> |                                         |                                                            |
| 0.71<br>(0.02 – 26.93)                          | 0.79<br>(0.06 – 10.33)                       | 0.89<br>(0.02 – 33.59)                  | <b>Edoxaban<br/>+ P2Y<sub>12</sub>i</b> |                                                            |
| 0.65<br>(0.02 – 25.35)                          | 0.72<br>(0.06 – 9.49)                        | 0.81<br>(0.02 – 30.88)                  | 0.92<br>(0.02 – 35.80)                  | <b>Dabigatran<br/>(110/150 mg)<br/>+ P2Y<sub>12</sub>i</b> |

## B) Stent thrombosis

**Figure 4:** The network meta-analysis results for (A) myocardial infarction, and (B) stent thrombosis.

Estimates are presented in odds ratio (OR) and 95% credible intervals (95% CrI). VKA: Vitamin K antagonist, P2Y<sub>12</sub>i: P2Y<sub>12</sub> inhibitor, LD: Low dose.

**Supplementary Table 1:** Inclusion/exclusion criteria and outcomes of the network meta-analysis

| <b>Inclusion and exclusion criteria</b>                                                                                                                                                                                                          |
|--------------------------------------------------------------------------------------------------------------------------------------------------------------------------------------------------------------------------------------------------|
| <b>Studies included if:</b> <ul style="list-style-type: none"><li>• Randomized Clinical trials</li><li>• Published in English</li><li>• Published in the last 10 years (from date of literature search)</li></ul>                                |
| <b>Studies excluded if:</b> <ul style="list-style-type: none"><li>• Non-randomized controlled trails</li><li>• Published in language other than English</li><li>• Published before more than 10 years (from date of literature search)</li></ul> |
| <b>Outcomes</b>                                                                                                                                                                                                                                  |
| <ul style="list-style-type: none"><li>• Major bleeding</li><li>• Clinically relevant non-major (CRNM) bleeding</li><li>• All-cause mortality</li><li>• Stroke</li><li>• Myocardial infarction (MI)</li><li>• Stent thrombosis</li></ul>          |



**Supplementary Table 2:** Risk of bias for the included randomized controlled trials

|                                                                       | PIONEER AF-PCI | RE-DUAL PCI | AUGUSTUS | ENTRUST AF-PCI |
|-----------------------------------------------------------------------|----------------|-------------|----------|----------------|
| Random sequence generation<br>( <i>Selection bias</i> )               | +              | +           | +        | +              |
| Allocation concealment<br>( <i>Selection bias</i> )                   | +              | +           | +        | +              |
| Blinding of participants and personnel<br>( <i>Performance bias</i> ) | +              | +           | +        | +              |
| Incomplete outcome data<br>( <i>Attrition bias</i> )                  | +              | +           | +        | +              |
| Selective reporting<br>( <i>Reporting bias</i> )                      | +              | +           | +        | +              |
| Other sources of bias                                                 | +              | +           | +        | +              |

(+) denotes low risk of bias, blank denotes unclear risk of bias, and (-) denotes high risk of bias.

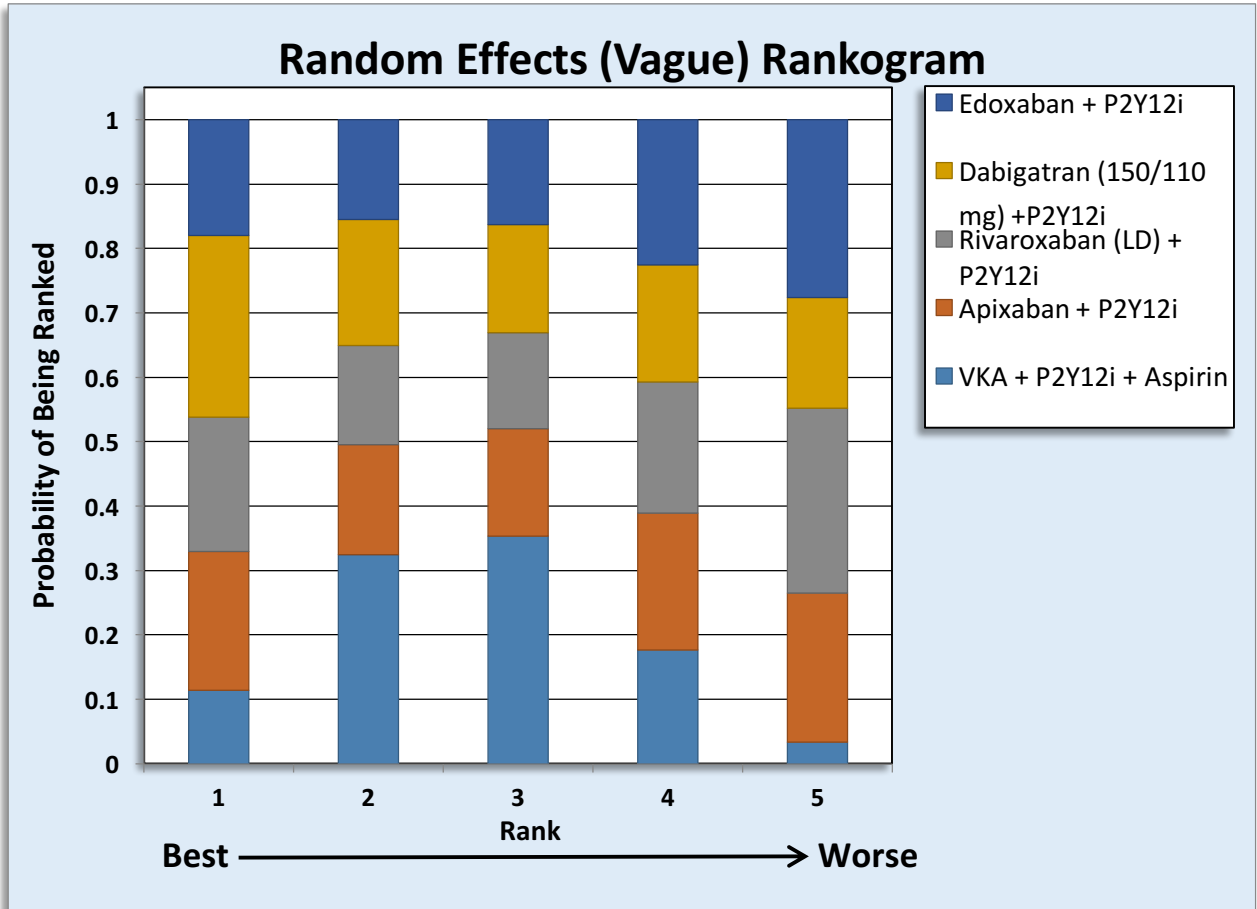

**Supplementary Figure 1:** The rankogram for different agents in the all-cause mortality outcome

VKA: Vitamin K antagonist, P2Y12i: P2Y<sub>12</sub> inhibitor, LD: Low dose.

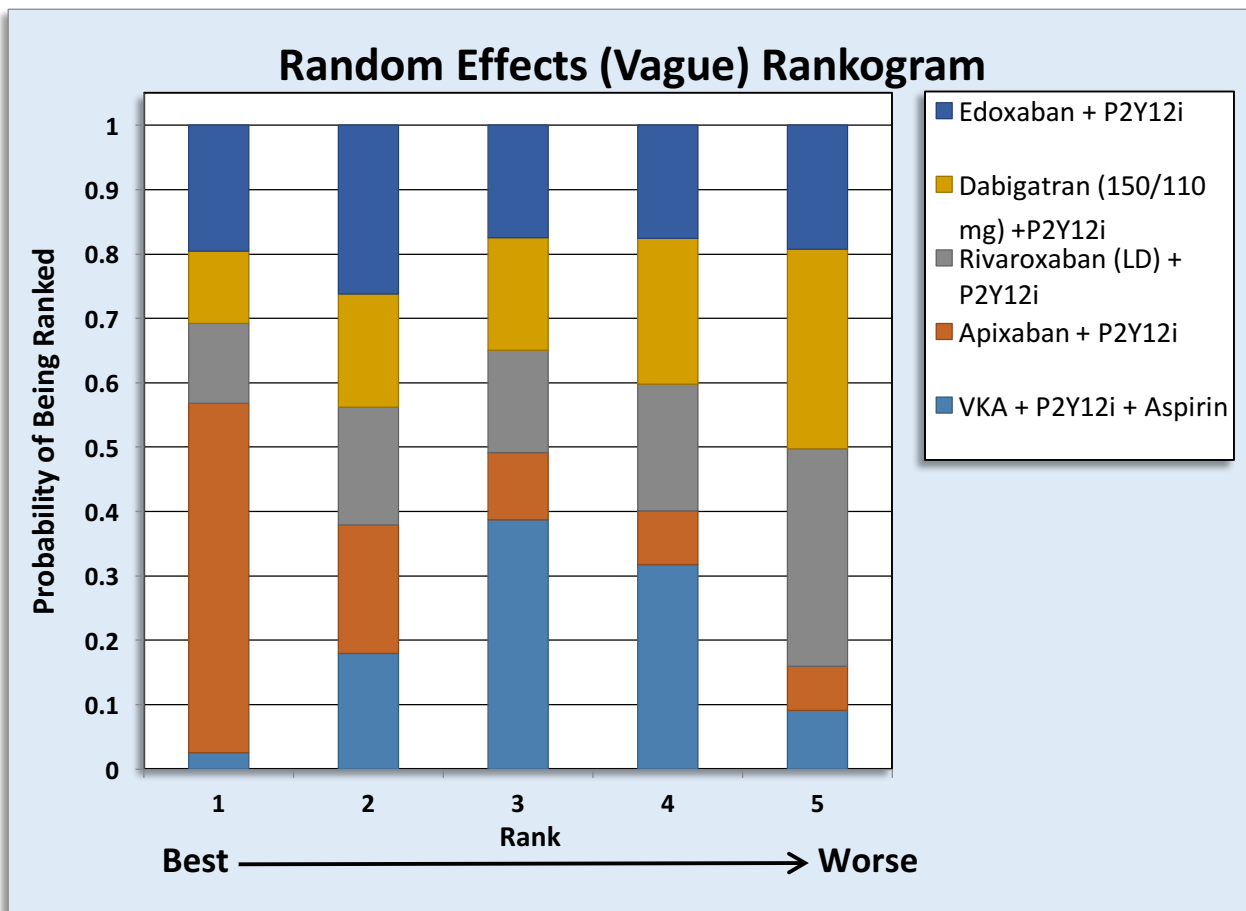

**Supplementary Figure 2:** The rankogram for different agents in the stroke outcome

VKA: Vitamin K antagonist, P2Y12i: P2Y<sub>12</sub> inhibitor, LD: Low dose.

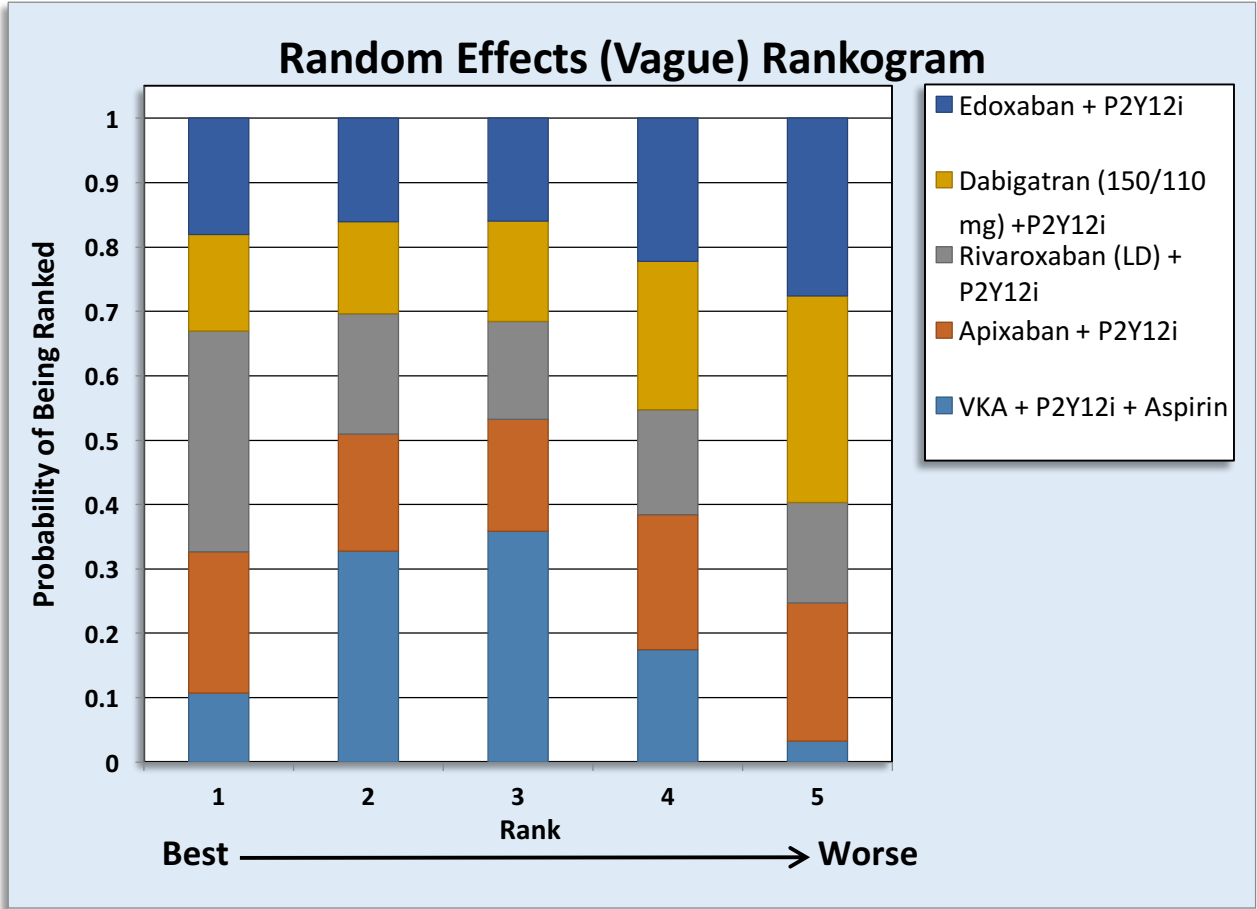

**Supplementary Figure 3:** The rankogram for different agents in the Myocardial Infarction outcome

VKA: Vitamin K antagonist, P2Y12i: P2Y<sub>12</sub> inhibitor, LD: Low dose.

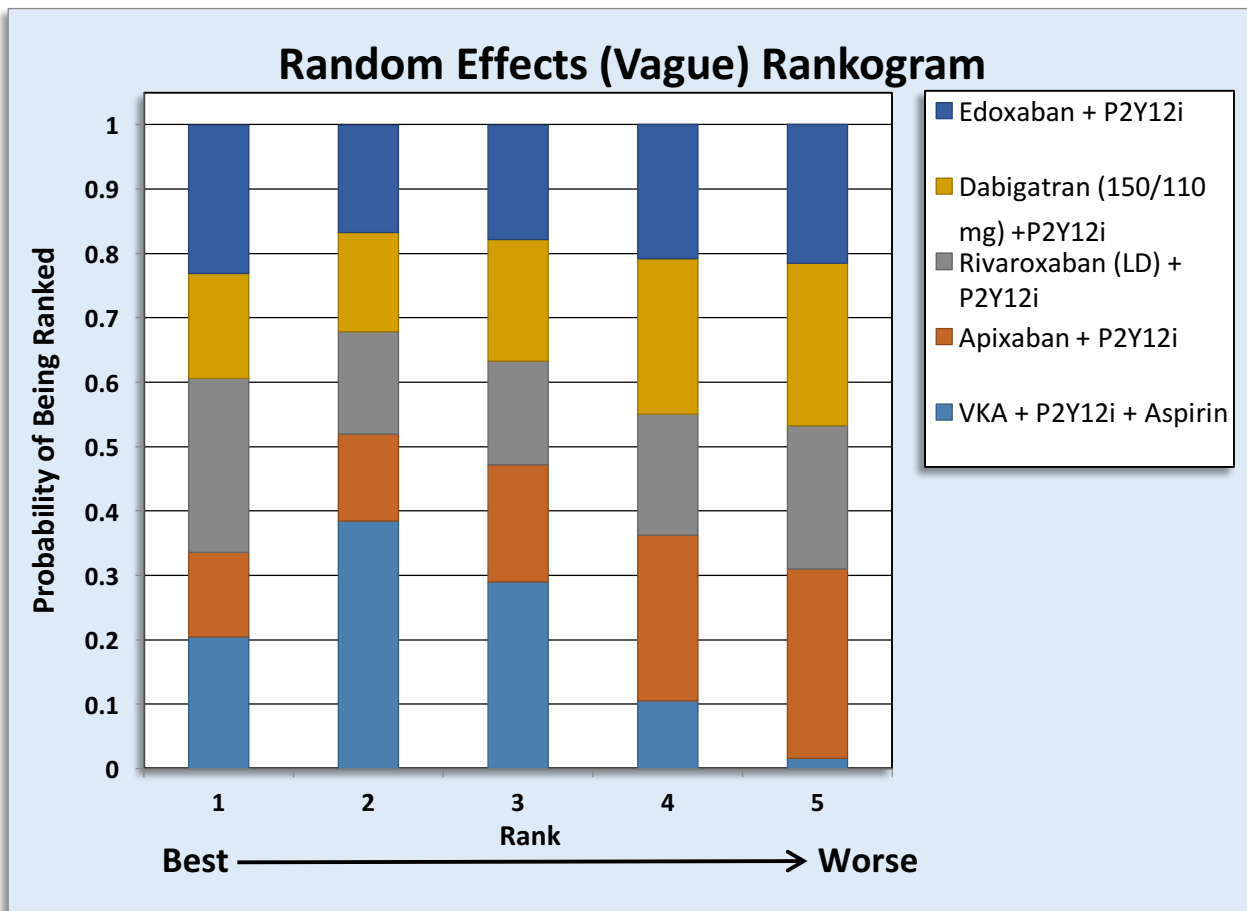

**Supplementary Figure 4:** The rankogram for different agents in the stent thrombosis outcome

VKA: Vitamin K antagonist, P2Y12i: P2Y<sub>12</sub> inhibitor, LD: Low dose.



# PRISMA 2009 Checklist

| Section/topic                      | #  | Checklist item                                                                                                                                                                                                                                                                                              | Reported on page # |
|------------------------------------|----|-------------------------------------------------------------------------------------------------------------------------------------------------------------------------------------------------------------------------------------------------------------------------------------------------------------|--------------------|
| <b>TITLE</b>                       |    |                                                                                                                                                                                                                                                                                                             |                    |
| Title                              | 1  | Identify the report as a systematic review, meta-analysis, or both.                                                                                                                                                                                                                                         | 1                  |
| <b>ABSTRACT</b>                    |    |                                                                                                                                                                                                                                                                                                             |                    |
| Structured summary                 | 2  | Provide a structured summary including, as applicable: background; objectives; data sources; study eligibility criteria, participants, and interventions; study appraisal and synthesis methods; results; limitations; conclusions and implications of key findings; systematic review registration number. | 2                  |
| <b>INTRODUCTION</b>                |    |                                                                                                                                                                                                                                                                                                             |                    |
| Rationale                          | 3  | Describe the rationale for the review in the context of what is already known.                                                                                                                                                                                                                              | 4                  |
| Objectives                         | 4  | Provide an explicit statement of questions being addressed with reference to participants, interventions, comparisons, outcomes, and study design (PICOS).                                                                                                                                                  | 5                  |
| <b>METHODS</b>                     |    |                                                                                                                                                                                                                                                                                                             |                    |
| Protocol and registration          | 5  | Indicate if a review protocol exists, if and where it can be accessed (e.g., Web address), and, if available, provide registration information including registration number.                                                                                                                               | NA                 |
| Eligibility criteria               | 6  | Specify study characteristics (e.g., PICOS, length of follow-up) and report characteristics (e.g., years considered, language, publication status) used as criteria for eligibility, giving rationale.                                                                                                      | 5                  |
| Information sources                | 7  | Describe all information sources (e.g., databases with dates of coverage, contact with study authors to identify additional studies) in the search and date last searched.                                                                                                                                  | 5                  |
| Search                             | 8  | Present full electronic search strategy for at least one database, including any limits used, such that it could be repeated.                                                                                                                                                                               | 5                  |
| Study selection                    | 9  | State the process for selecting studies (i.e., screening, eligibility, included in systematic review, and, if applicable, included in the meta-analysis).                                                                                                                                                   | 5, and Table S1    |
| Data collection process            | 10 | Describe method of data extraction from reports (e.g., piloted forms, independently, in duplicate) and any processes for obtaining and confirming data from investigators.                                                                                                                                  | 5                  |
| Data items                         | 11 | List and define all variables for which data were sought (e.g., PICOS, funding sources) and any assumptions and simplifications made.                                                                                                                                                                       | 5                  |
| Risk of bias in individual studies | 12 | Describe methods used for assessing risk of bias of individual studies (including specification of whether this was done at the study or outcome level), and how this information is to be used in any data synthesis.                                                                                      | 5                  |
| Summary measures                   | 13 | State the principal summary measures (e.g., risk ratio, difference in means).                                                                                                                                                                                                                               | 5                  |
| Synthesis of results               | 14 | Describe the methods of handling data and combining results of studies, if done, including measures of consistency (e.g., I <sup>2</sup> ) for each meta-analysis.                                                                                                                                          | 5                  |

For peer review only - <http://bmjopen.bmj.com/site/about/guidelines.xhtml>



# PRISMA 2009 Checklist

| Section/topic                 | #  | Checklist item                                                                                                                                                                                           | Reported on page # |
|-------------------------------|----|----------------------------------------------------------------------------------------------------------------------------------------------------------------------------------------------------------|--------------------|
| Risk of bias across studies   | 15 | Specify any assessment of risk of bias that may affect the cumulative evidence (e.g., publication bias, selective reporting within studies).                                                             | 5                  |
| Additional analyses           | 16 | Describe methods of additional analyses (e.g., sensitivity or subgroup analyses, meta-regression), if done, indicating which were pre-specified.                                                         | NA                 |
| <b>RESULTS</b>                |    |                                                                                                                                                                                                          |                    |
| Study selection               | 17 | Give numbers of studies screened, assessed for eligibility, and included in the review, with reasons for exclusions at each stage, ideally with a flow diagram.                                          | 6                  |
| Study characteristics         | 18 | For each study, present characteristics for which data were extracted (e.g., study size, PICOS, follow-up period) and provide the citations.                                                             | 6 - 9              |
| Risk of bias within studies   | 19 | Present data on risk of bias of each study and, if available, any outcome level assessment (see item 12).                                                                                                | 6, and Table S2    |
| Results of individual studies | 20 | For all outcomes considered (benefits or harms), present, for each study: (a) simple summary data for each intervention group (b) effect estimates and confidence intervals, ideally with a forest plot. | 6, 7               |
| Synthesis of results          | 21 | Present results of each meta-analysis done, including confidence intervals and measures of consistency.                                                                                                  | 7, 8               |
| Risk of bias across studies   | 22 | Present results of any assessment of risk of bias across studies (see Item 15).                                                                                                                          | 6, and Table S2    |
| Additional analysis           | 23 | Give results of additional analyses, if done (e.g., sensitivity or subgroup analyses, meta-regression [see Item 16]).                                                                                    | NA                 |
| <b>DISCUSSION</b>             |    |                                                                                                                                                                                                          |                    |
| Summary of evidence           | 24 | Summarize the main findings including the strength of evidence for each main outcome; consider their relevance to key groups (e.g., healthcare providers, users, and policy makers).                     | 10, 11             |
| Limitations                   | 25 | Discuss limitations at study and outcome level (e.g., risk of bias), and at review-level (e.g., incomplete retrieval of identified research, reporting bias).                                            | 11                 |
| Conclusions                   | 26 | Provide a general interpretation of the results in the context of other evidence, and implications for future research.                                                                                  | 11                 |
| <b>FUNDING</b>                |    |                                                                                                                                                                                                          |                    |
| Funding                       | 27 | Describe sources of funding for the systematic review and other support (e.g., supply of data); role of funders for the systematic review.                                                               | 14                 |

From: Moher D, Liberati A, Tetzlaff J, Altman DG, The PRISMA Group (2009). Preferred Reporting Items for Systematic Reviews and Meta-Analyses: The PRISMA Statement. PLoS Med 6(6): e1000097. doi:10.1371/journal.pmed1000097

For more information, visit: [www.prisma-statement.org](http://www.prisma-statement.org).

For peer review only - <http://bmjopen.bmj.com/site/about/guidelines.xhtml>
