# Supplementary material for: Safety and efficacy of dual versus triple antithrombotic therapy (DAT vs TAT) in patients with atrial fibrillation following a PCI: a systematic review and network meta-analysis
Source: PubMed Central journal article supplement — BMJ Open. 2020 Sep 29;10(9):e036138. doi: 10.1136/bmjopen-2019-036138 (PMC7526290; doi:10.1136/bmjopen-2019-036138), 2020-09-29
Supplement: bmjopen-2019-036138supp001.pdf [file bmjopen-2019-036138supp001.pdf]

**Supplementary Table 1:** Inclusion/exclusion criteria and outcomes of the network meta-analysis

| <b>Inclusion and exclusion criteria</b>                                                                                                                                                                                                                                                                                                                                                                                                                                          |
|----------------------------------------------------------------------------------------------------------------------------------------------------------------------------------------------------------------------------------------------------------------------------------------------------------------------------------------------------------------------------------------------------------------------------------------------------------------------------------|
| <p><b>Studies included if:</b></p> <ul style="list-style-type: none"><li>• Randomized Clinical trials</li><li>• Published in English</li><li>• Published in the last 10 years (from date of literature search)</li></ul> <p><b>Studies excluded if:</b></p> <ul style="list-style-type: none"><li>• Non-randomized controlled trails</li><li>• Published in language other than English</li><li>• Published before more than 10 years (from date of literature search)</li></ul> |
| <b>Outcomes</b>                                                                                                                                                                                                                                                                                                                                                                                                                                                                  |
| <ul style="list-style-type: none"><li>• Major bleeding</li><li>• Clinically relevant non-major (CRNM) bleeding</li><li>• All-cause mortality</li><li>• Stroke</li><li>• Myocardial infarction (MI)</li><li>• Stent thrombosis</li></ul>                                                                                                                                                                                                                                          |

**Supplementary Table 2:** Risk of bias for the included randomized controlled trials

|                                                                       | PIONEER AF-PCI | RE-DUAL PCI | AUGUSTUS | ENTRUST AF-PCI |
|-----------------------------------------------------------------------|----------------|-------------|----------|----------------|
| Random sequence generation<br>( <i>Selection bias</i> )               | +              | +           | +        | +              |
| Allocation concealment<br>( <i>Selection bias</i> )                   | +              | +           | +        | +              |
| Blinding of participants and personnel<br>( <i>Performance bias</i> ) | +              | +           | +        | +              |
| Incomplete outcome data<br>( <i>Attrition bias</i> )                  | +              | +           | +        | +              |
| Selective reporting<br>( <i>Reporting bias</i> )                      | +              | +           | +        | +              |
| Other sources of bias                                                 | +              | +           | +        | +              |

(+) denotes low risk of bias, blank denotes unclear risk of bias, and (-) denotes high risk of bias.

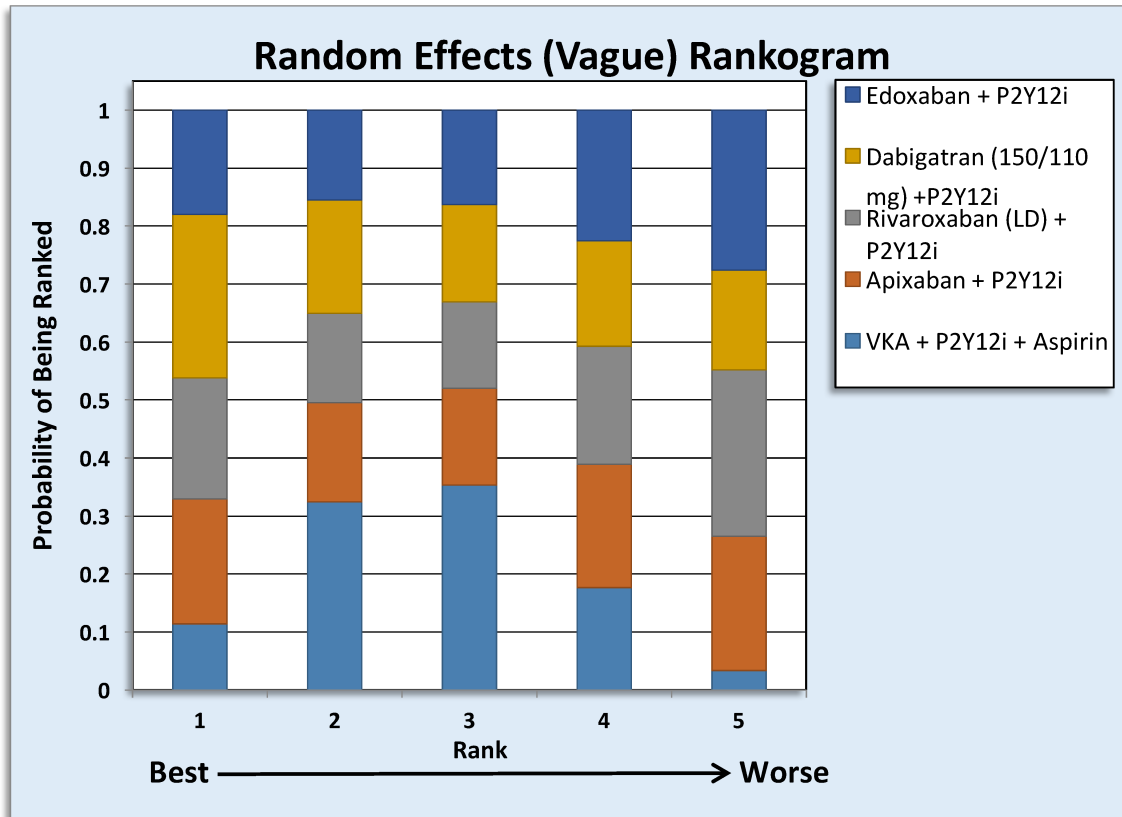

**Supplementary Figure 1:** The rankogram for different agents in the all-cause mortality outcome

VKA: Vitamin K antagonist, P2Y12i: P2Y<sub>12</sub> inhibitor, LD: Low dose.

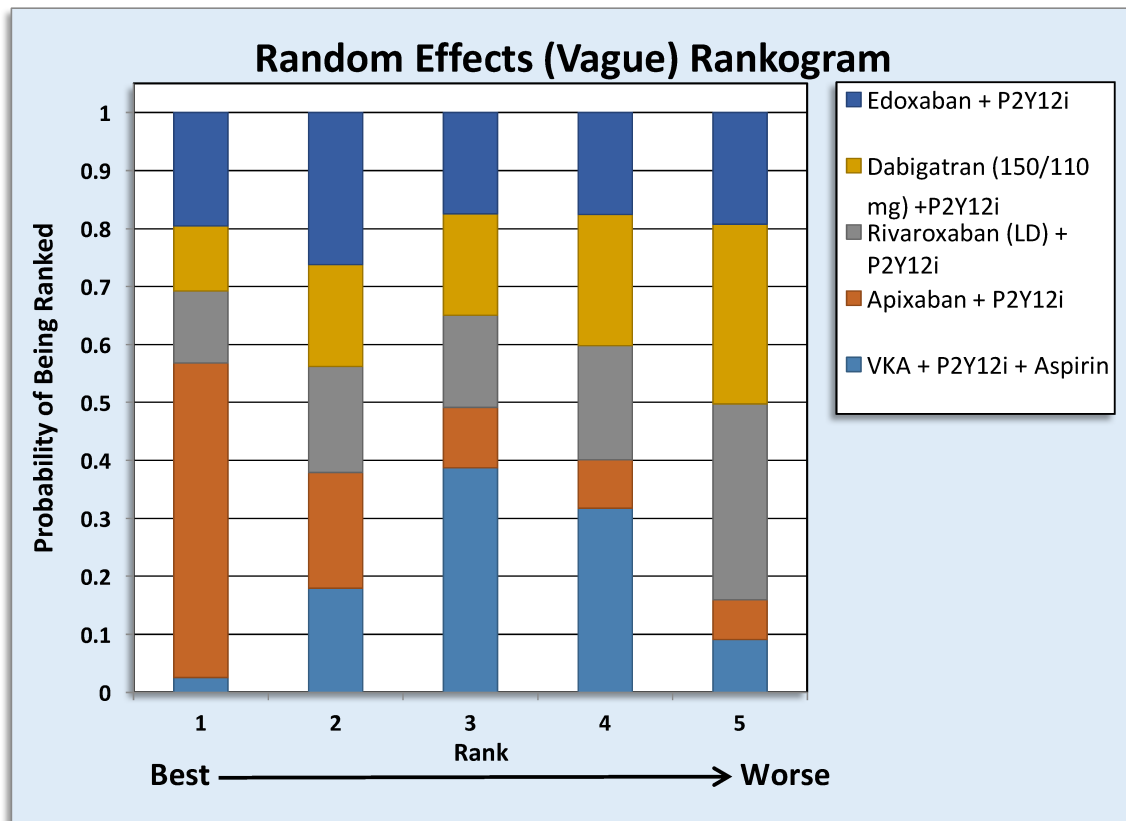

**Supplementary Figure 2:** The rankogram for different agents in the stroke outcome

VKA: Vitamin K antagonist, P2Y12i: P2Y<sub>12</sub> inhibitor, LD: Low dose.

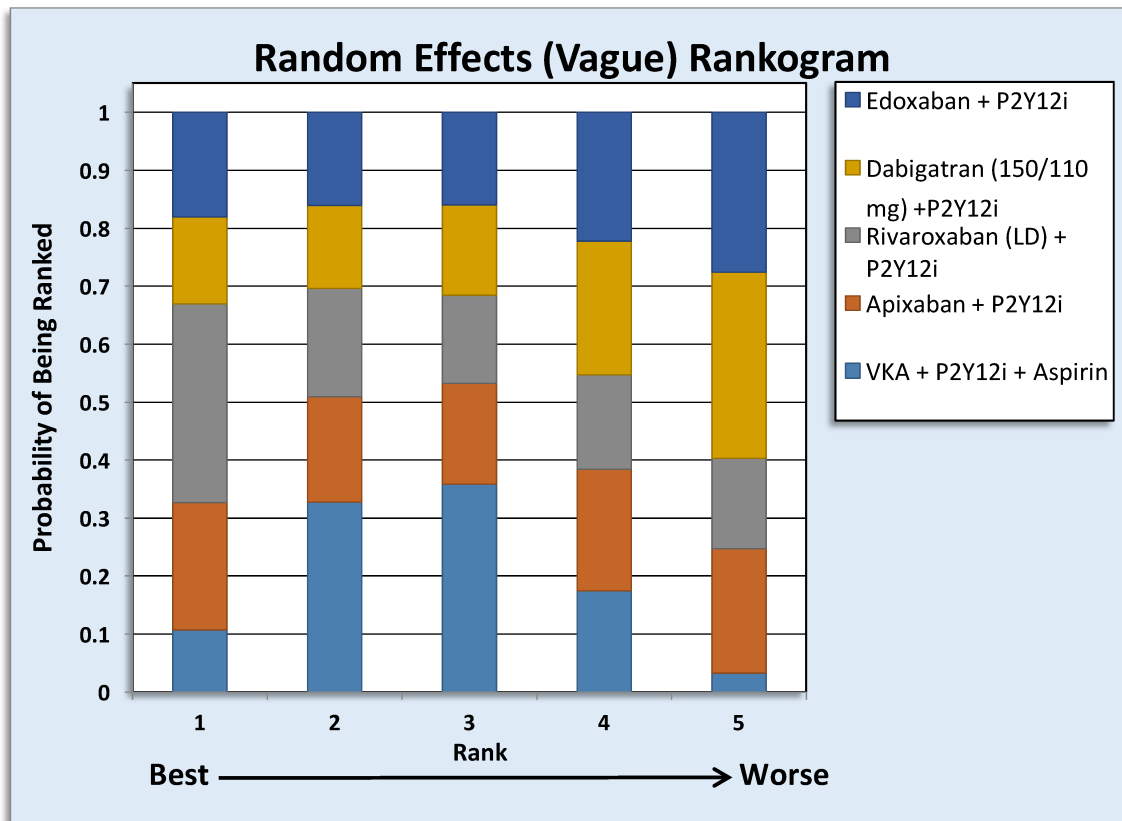

**Supplementary Figure 3:** The rankogram for different agents in the Myocardial Infarction outcome

VKA: Vitamin K antagonist, P2Y12i: P2Y<sub>12</sub> inhibitor, LD: Low dose.

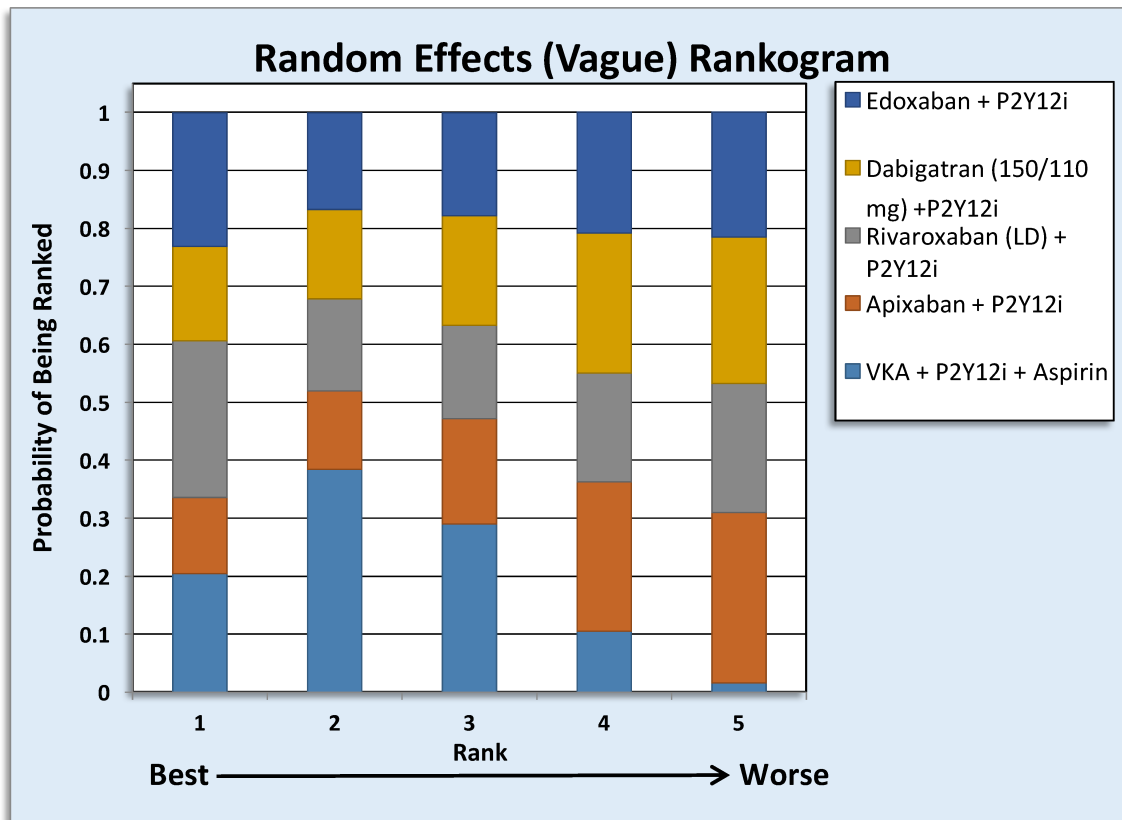

**Supplementary Figure 4:** The rankogram for different agents in the stent thrombosis outcome

VKA: Vitamin K antagonist, P2Y12i: P2Y<sub>12</sub> inhibitor, LD: Low dose.
